1 **Cellular heterogeneity during mouse pancreatic ductal adenocarcinoma progression at**  
2 **single-cell resolution**

3  
4 Abdel Nasser Hosein<sup>1,3,7</sup>, Huocong Huang<sup>1</sup>, Zhaoning Wang<sup>2</sup>, Kamalpreet Parmar<sup>5</sup>, Wenting  
5 Du<sup>1</sup>, Jonathan Huang<sup>7</sup>, Anirban Maitra<sup>6,7</sup>, Eric Olson<sup>2</sup>, Udit Verma<sup>3</sup>, Rolf A. Brekken<sup>1,4</sup>

6  
7 <sup>1</sup>Hamon Center for Therapeutic Oncology Research, Division of Surgical Oncology, Department  
8 of Surgery, <sup>2</sup>Department of Molecular Biology, <sup>3</sup>Department of Internal Medicine – Division of  
9 Hematology & Oncology, <sup>4</sup>Department of Pharmacology, and <sup>5</sup>Department of Pathology,  
10 University of Texas Southwestern Medical Center, Dallas, Texas, USA. <sup>6</sup>Department of  
11 Pathology and <sup>7</sup>Department of Translational Molecular Pathology, University of Texas MD  
12 Anderson Cancer Center, Houston, TX, USA.

13  
14 **Short title: scRNA-seq of PDA GEMMs**

15  
16 **Corresponding author**

17 Rolf A. Brekken, PhD  
18 Hamon Center for Therapeutic Oncology Research  
19 University of Texas Southwestern Medical Center  
20 6000 Harry Hines Blvd.  
21 Dallas, TX 75390-8593  
22 Tel: 214.648.5151; Fax: 214.648.4940  
23 [rolf.brekken@utsouthwestern.edu](mailto:rolf.brekken@utsouthwestern.edu)

24  
25 **Disclosures**

26 The authors have no conflicts of interest to report.

27  
28 **Writing assistance**

29 Editorial assistance was provided by Dave Primm of the UT Southwestern Department of  
30 Surgery.

31  
32 **Funding**

33 This work was supported by NIH grants R01 CA192381 and U54 CA210181 Project 2 to RAB,  
34 the Effie Marie Cain Fellowship to RAB, the H. Ray and Paula Calvert Pancreatic Cancer  
35 Research Fund to UV, NIH grants U01 CA200468, U01 CA196403, R01 CA218004, R01  
36 CA204969, P01 CA117696 to AM and grants from the NIH and Welch Foundation to EO.

37 **Author contributions**

38  
39 ANH: study concept and design, acquisition of data, analysis and interpretation of data, drafting  
40 of the manuscript. HH: study concept and design, acquisition of data, analysis and interpretation  
41 of data, drafting of the manuscript. ZW: bioinformatics analyses, interpretation of data. KP:  
42 pathologic interpretation and scoring of human tissue samples. WD: acquisition of data. JH:  
43 bioinformatics analyses, critical review of the manuscript. AM: bioinformatics analyses,  
44 interpretation of data, critical review of the manuscript. EO: bioinformatics analyses,  
45 interpretation of data, critical revision of the manuscript. UV: study concept and design, critical  
46 revision of the manuscript. RAB: study concept and design, interpretation of data, drafting of  
47 the manuscript.

48  
49 **Abbreviations**

50 ADM, acinar-to-ductal metaplasia  
51 BET, bromodomain and extraterminal  
52 CAF, cancer-associated fibroblast  
53 FB, fibroblast population  
54 GEM, gel bead in emulsion  
55 GEMM, genetically engineered mouse model  
56 GO, gene ontology  
57 PDA, pancreatic ductal adenocarcinoma  
58 PSC, pancreatic stellate cell  
59 scRNA-seq, single-cell RNA sequencing  
60 UMI, unique molecular identifiers

61

62 **Abstract:**

63 **Background & Aims**

64 Pancreatic ductal adenocarcinoma (PDA) is a major cause of cancer-related death with limited  
65 therapeutic options available. This highlights the need for improved understanding of the biology  
66 of PDA progression. The progression of PDA is a highly complex and dynamic process featuring  
67 changes in cancer cells and stromal cells; however, a comprehensive characterization of PDA  
68 cancer cell and stromal cell heterogeneity during disease progression is lacking. In this study,  
69 we aimed to profile cell populations and understand their phenotypic changes during PDA  
70 progression.

71

72 **Methods**

73 We employed single-cell RNA sequencing technology to agnostically profile cell heterogeneity  
74 during different stages of PDA progression in genetically engineered mouse models.

75

76 **Results**

77 Our data indicate that an epithelial-to-mesenchymal transition of cancer cells accompanies  
78 tumor progression. We also found distinct populations of macrophages with increasing  
79 inflammatory features during PDA progression. In addition, we noted the existence of three  
80 distinct molecular subtypes of fibroblasts in the normal mouse pancreas, which ultimately gave  
81 rise to two distinct populations of fibroblasts in advanced PDA, supporting recent reports on  
82 intratumoral fibroblast heterogeneity. Our data also suggest that cancer cells and fibroblasts are  
83 dynamically regulated by epigenetic mechanisms.

84

85 **Conclusion**

86 This study systematically outlines the landscape of cellular heterogeneity during the progression  
87 of PDA. It strongly improves our understanding of the PDA biology and has the potential to aid  
88 in the development of therapeutic strategies against specific cell populations of the disease.

89

90 Key words: single-cell RNA sequencing; pancreatic cancer; cellular heterogeneity; fibroblasts;  
91 macrophages

92

## 93 **Introduction**

94 Pancreatic ductal adenocarcinoma (PDA) carries the highest mortality rate of all major  
95 malignancies in industrialized countries, with a 5-year survival of 8.5%. Patients are faced with  
96 limited treatment options that achieve poor durable response rates, highlighting the need for an  
97 improved understanding of PDA disease biology [1]. PDA progression is a complex and  
98 dynamic process that requires interaction between cancer cells and stromal cells [2]. It is  
99 characterized by the formation of a unique microenvironment consisting of heterogeneous  
100 stromal cell populations that include fibroblasts, macrophages, lymphocytes, and endothelial  
101 cells. These stromal compartments are critical in driving PDA biology [3].

102  
103 The dynamic phenotypic changes in different cell populations during PDA progression is not  
104 fully understood. Gene expression profiling of bulk tissues provides a limited picture of the  
105 cellular complexity of the heterogeneous cell populations in PDA. In contrast, single-cell RNA  
106 sequencing (scRNA-seq) has the potential to enable gene expression profiling at the level of the  
107 individual cell [4] and provides a powerful tool to understand the cellular heterogeneity of PDA.  
108 We applied scRNA-seq to investigate gene expression changes of cancer cells and stromal  
109 cells during PDA progression in genetically engineered mouse models (GEMMs). This unbiased  
110 approach provided evidence of considerable intratumoral cellular heterogeneity, including  
111 molecular insights into epithelial and mesenchymal populations of cancer cells and distinct  
112 molecular subtypes of macrophages and cancer-associated fibroblasts (CAFs).

113

## 114 **Methods**

### 115 *Animal studies*

116 *KIC*, *KPC* and *KPFC* mice were generated as previously described [5-7]. Mice were sacrificed  
117 when they were moribund: 60 days old for the *KIC* (n = 3, late PDA) and *KPFC* (n = 1) or 6  
118 months old for the *KPC* (n = 1). The 2 *KIC* mice were sacrificed at 40 days old (early PDA) and  
119 “normal pancreas” mice (n = 2) were sacrificed at 60 days old. In experiments using more than  
120 one mouse, tissues were pooled prior to enzymatic digestion. The *KPFC* mouse had a pure  
121 C57BL/6 genetic background and all others had a mixed background (C57BL/6 with FVB).  
122 Ultrasound imaging was carried out under general anesthesia with isoflurane. Mice were  
123 euthanized by cervical dislocation under anesthesia. AVMA Guidelines for the Euthanasia of  
124 Animals were strictly followed. Tissues were either fixed in 10% formalin for  
125 immunohistochemistry or enzymatically digested for single-cell analysis.

126

127 *Tissue digestion*

128 A 10x digestion buffer was prepared in PBS: collagenase type I (450 units/ml, Worthington  
129 Biochemical, Lakewood, NJ), collagenase type II (150 units/ml, Worthington), collagenase type  
130 III (450 units/ml, Worthington), collagenase type IV (450 units/ml, Gibco/Thermo Fisher,  
131 Waltham, MA), elastase (0.8 units/ml, Worthington), hyaluronidase (300 units/ml, Sigma-Aldrich,  
132 St. Louis, MO), and DNase type I (250 units/ml, Sigma-Aldrich). Tumors and pancreas were  
133 enzymatically digested into a single-cell suspension. Briefly, freshly dissected tissue was placed  
134 into a 10-cm tissue culture dish and a sterile razor blade was used to cut the tissue into fine  
135 pieces. Samples were resuspended in PBS and washed twice by centrifuge at 2000 rpm for 3  
136 minutes and added to a 50 ml tube containing 1x digestion buffer containing 1% FBS. The tube  
137 was incubated on a shaker at 37°C for 60 minutes. Then 35 ml of PBS was added and cells  
138 were washed three times prior to filtering out debris using a 70 µm mesh filter. Single cells were  
139 resuspended in 100 µl of PBS in preparation for single-cell library creation. Cell viability was  
140 measured by trypan blue. Viability was 80% for the normal pancreas and late *KIC* samples, 75%  
141 for the early *KIC* and *KPfc*, and 90% for the *KPC*.

142

143 *Single-cell cDNA library preparation and sequencing*

144 Library generation was performed using the 10x Chromium System (10X Genomics Inc.,  
145 Pleasanton, CA). Single-cell suspensions were washed in 1x PBS (calcium- and magnesium-  
146 free) containing 0.04% weight/volume bovine serum albumin (400 µg/ml) and brought to a  
147 concentration of 200-700 cells/µl. The appropriate volume of cells was loaded with Single Cell 3'  
148 gel beads into a Single Cell A Chip and run on the Chromium Controller. Gel bead in emulsion  
149 (GEM) was incubated and then broken. Silane magnetic beads were used to clean up the GEM  
150 reaction mixture. Read 1 primer sequence was added during incubation and full-length,  
151 barcoded cDNA was amplified by PCR after cleanup. Sample size was checked on an Agilent  
152 Tapestation 4200 (Agilent, Santa Clara, CA) using DNAHS 5000 tape and concentration  
153 determined by a Qubit 4 Fluorometer (Thermo Fisher) using the DNA HS assay. Samples were  
154 enzymatically fragmented and underwent size selection before proceeding to library  
155 construction. During library preparation, Read 2 primer sequence, sample index, and both  
156 Illumina adapter sequences were added. Samples were cleaned up using AMPure XP beads  
157 (Beckman Coulter, Brea, CA) and post-library preparation quality control was performed using  
158 DNA 1000 tape on the Agilent Tapestation 4200. The final concentration was ascertained using  
159 the Qubit 4 Fluorometer DNA HS assay. Samples were loaded at 1.5 pM and run on the

160 Illumina NextSeq500 High Output Flowcell (Illumina, San Diego, CA) using V2.5 chemistry. The  
161 run configuration was 26 x 98 x 8.

162

### 163 *Bioinformatic analyses*

164 We used Cell Ranger version 1.3.1 (10x Genomics) to process raw sequencing data and the R-  
165 package Seurat version 2.0 [8] for downstream analyses. Cell clusters were identified via the  
166 FindClusters function using a resolution of 0.6 for all samples, using a graph-based clustering  
167 algorithm implemented in Seurat. Marker genes for each cluster were computed, and  
168 expression levels of several known marker genes were examined. Different clusters expressing  
169 known marker genes for a given cell type were selected and combined as one for each cell  
170 type. Gene ontology and pathway analysis were performed using the DAVID bioinformatics  
171 suite, version 6.8 [9].

172

### 173 *Histological analysis*

174 Formalin-fixed tissues were embedded in paraffin and cut in 5  $\mu$ m sections. Sections were  
175 evaluated by H&E and immunohistochemical analysis using antibodies specific for vimentin  
176 (5741, Cell Signaling Technology, Danvers, MA), BRD4 (AB128874, Abcam, Cambridge, MA),  
177 Sox9 (AB5535, EMD Millipore, Burlington, MA), CDH11 (NBP2-15661, Novus Biologicals,  
178 Centennial, CO), and H3K27ac (AB4729, Abcam). Following an initial antigen retrieval with Tris-  
179 EDTA-glycerol (10%) buffer and inhibition of endogenous peroxidase activity, the slides were  
180 incubated with primary antibody overnight at 4°C. Slides were then incubated with horseradish  
181 peroxidase or alkaline phosphatase conjugated secondary antibody (Vector Laboratories,  
182 Beringame, CA) for 1 hour at 25°C. This was followed by development using the appropriate  
183 chromogenic substrate: DAB, Warp Red or Ferangi Blue (Biocare Medical, Pacheco, CA). In the  
184 case of multichannel immunohistochemistry, slides were subsequently stripped using a sodium  
185 citrate buffer and by boiling at 110°C for 3 minutes. The procedure was then repeated as above  
186 using a different-colored chromogen for development. All human PDA samples were provided  
187 by the UT Southwestern Tissue Management Shared Resource and their use was approved by  
188 the UT Southwestern institutional review board for the purpose of research. All patient samples  
189 were de-identified and interpreted by a board-certified pathologist (KP).

190

## 191 **Results**

192 *Cellular heterogeneity during PDA progression*

193 We sought to determine the composition of single pancreatic cancer cells during progression in  
194 GEMMs. Normal mouse pancreas, 40-day-old *KIC* (*Kras*<sup>L<sup>SL</sup>-G12D</sup>; *Cdkn2a*<sup>flox/flox</sup>; *Ptf1a*<sup>Cre/+</sup>) mouse  
195 pancreas, termed “early *KIC*” (with early neoplastic changes confirmed by ultrasound;  
196 Supplementary Fig. 1), and 60-day-old *KIC* pancreas, termed “late *KIC*” (Fig. 1A) were freshly  
197 isolated and enzymatically digested followed by single-cell cDNA library generation using the  
198 10x Genomics platform [10]. Libraries were subsequently sequenced at a depth of more than  
199 10<sup>5</sup> reads per cell. We performed stringent filtering, normalization, and graph-based clustering,  
200 which identified distinct cell populations in the normal pancreas and each stage of PDA.

201  
202 In the normal mouse pancreas, 2354 cells were sequenced and classified into appropriate cell  
203 types based on the gene expression of known markers: acinar cells, islet cells, macrophages, T  
204 cells, and B cells, as well as three distinct populations of fibroblasts. Fibroblasts-1, fibroblasts-2,  
205 and fibroblasts-3 (Fig. 1B and E) were noted. In the early *KIC* pancreas (3524 cells sequenced),  
206 the emergence of a cancer cell population was observed (9.9% of cells), expressing known PDA  
207 markers such as *Krt18* and *Sox9* [11] (Fig. 1C and F). The acinar cell population was  
208 substantially reduced, while there was a marked increase in total macrophages and fibroblasts.  
209 Of note, the same three populations of fibroblasts seen in the normal pancreas were identified in  
210 the early *KIC* lesion. Additionally, endothelial cells were observed at this stage. This indicates  
211 that the expansion of fibroblasts and macrophages is an early event during PDA development,  
212 accompanying tumor initiation. We next characterized the late *KIC* pancreas (804 cells  
213 sequenced) and noted the absence of normal exocrine (acinar) and endocrine (islet) cells (Fig.  
214 1D and G). Instead, two distinct populations of cancer cells were present, suggesting  
215 phenotypic cancer cell heterogeneity as a late event in the course of the disease. We also  
216 observed the presence of only two distinct fibroblast populations, which had a similar  
217 percentage in relation to total cells. Noticeably, macrophages became a predominant cell  
218 population in the late *KIC* tumor. Moreover, we observed lymphocytes at this stage. The cellular  
219 heterogeneity in cancer cells and stromal cells in the early and late *KIC* lesions highlighted the  
220 dynamic cellular changes that occur during PDA progression.

221  
222 *Mesenchymal cancer cells emerge in advanced PDA*

223 Gene expression analysis of cancer cell epithelial markers (*Cdh1*, *Epcam*, *Gjb1*, and *Cldn3*) and  
224 mesenchymal markers (*Cdh2*, *Cd44*, *Axl*, *Vim*, and *S100a4*) revealed that early *KIC* cancer cell  
225 populations assumed an epithelial expression profile (Fig. 2A and C). This is in contrast to tumor  
226 cell populations in the late *KIC* tumors, where we identified two distinct cancer cell populations:

227 one enriched for epithelial markers and the other, more abundant population, enriched for  
228 mesenchymal markers (Fig. 2B and C). These data support that tumor cell epithelial plasticity  
229 contributes to cancer cell heterogeneity during the progression of *KIC* tumors.

230  
231 The hierarchical clustering of the top significant genes in each of the three cancer cell  
232 populations (epithelial cancer cells in early *KIC*, epithelial and mesenchymal cancer cell  
233 populations in late *KIC*) was performed (Fig. 2D). In addition, gene clusters from the cancer cell  
234 populations were subjected to pathway and gene ontology (GO) analysis. First, we compared  
235 cancer cells of the early *KIC* population to the total cancer cells of the late *KIC* and found that  
236 the most downregulated genes in late *KIC* cancer cells were associated with normal pancreatic  
237 function such as pancreatic secretion, digestion and absorption, and insulin secretion (Fig. 2E  
238 and F). Moreover, normal pancreatic acinar genes such as *Try4*, *Try5*, *Cela2a*, *Cela3b*, *Reg2*,  
239 and *Rnase1* were expressed at higher levels in early *KIC* cancer cells, while late *KIC* cancer  
240 cells expressed a higher level of the pancreatic ductal gene *Muc1* (Fig. 2D). This is suggestive  
241 of an ongoing acinar-to-ductal metaplasia (ADM) during tumor progression in this GEMM. In  
242 contrast, the most upregulated genes in late *KIC* cancer cells were associated with ribosome,  
243 glycolysis/gluconeogenesis, and amino acid biosynthesis, which is highly suggestive of  
244 increased translation and metabolically active cancer cells in established *KIC* tumors.  
245 Interestingly, pathways previously reported to be closely associated with the stroma and  
246 progression of PDA were also highlighted, such as ECM-receptor interaction [12], TGF $\beta$  [13],  
247 and hippo signaling pathways [14]. We then compared early *KIC* cancer cells with the late *KIC*  
248 epithelial cancer cell population to understand the mechanisms that promoted the progression  
249 of PDA in the epithelial cancer cell compartment. Interestingly, similar cell functions/signaling  
250 pathways were identified by comparing the two epithelial cancer cell populations (Fig. 2G and  
251 H). Taken together, these analyses objectively demonstrate an ADM state during the  
252 progression of *KIC* tumors and suggest that stroma-cancer cell interaction promotes the  
253 progression of PDA and cancer cell heterogeneity.

254  
255 *Mesenchymal cancer cells exist in advanced PDA GEMMs with different diverse mutations*  
256 In addition to *KRAS* mutations, additional driver events are required for PDA progression [8],  
257 with *TP53* and *INK4A* being the second- and third-most commonly mutated genes in human  
258 PDA, respectively. As such, we sought to understand the effect of different secondary driver  
259 mutations on the phenotypes and heterogeneity of cancer cells. We performed scRNA-seq in  
260 another PDA GEMM, *KPfc* (*Kras*<sup>LSL-G12D</sup>; *Trp53*<sup>Flox/Flox</sup>; *Pdx1*<sup>Cre/+</sup>) (Fig. 3A). Consistent with late



261 *KIC* tumors, two distinct cancer cell populations expressing *Krt18* and *Sox9* were noted in late  
262 *KPFC* (60-day-old) tumors (Fig. 3A and B), one marked by epithelial markers such as *Gjb1*, *Tjb1*,  
263 *Ocln*, and *Cldn3*, while the other was marked by mesenchymal markers such as *Vim*, *Cd44*, *Axl*,  
264 *S100a4*, and *Fbln2* (Fig. 3C and D). Epithelial and mesenchymal cancer cell populations in  
265 *KPFC* mice shared many genes in common with the corresponding populations in *KIC*; however,  
266 they also expressed unique gene signatures (Fig. 3F).

267  
268 We then compared the total cancer cell gene signatures between late *KIC* and late *KPFC* mice  
269 by KEGG and Biocarta pathway analysis methods, in an attempt to identify potential differences  
270 in cancer cell signaling pathways caused by the different secondary driver mutations. As  
271 expected, the p53 signaling pathway was upregulated in the *KIC* model by comparison to the  
272 *KPFC* model (Fig. 3E). The analyses of late *KIC* and late *KPFC* mice suggests that cancer cell  
273 heterogeneity is a late-stage tumor event that occurs in the setting of multiple secondary driver  
274 mutations. However, under the same oncogenic *Kras* mutation, different secondary driver  
275 mutations can potentially lead to different signaling pathways that drive PDA progression.

276  
277 *Macrophage heterogeneity during PDA progression*

278 We found a marked increase in the size of the macrophage population as PDA progressed from  
279 normal pancreas to early *KIC* and eventually late *KIC* tumors (Fig. 1B-D). We further  
280 characterized the macrophage compartment during PDA progression by subclustering  
281 macrophages in early and late *KIC* tumors, which revealed three transcriptionally distinct  
282 macrophage clusters in early *KIC* and two in late *KIC* (Fig. 4A and C).

283  
284 Macrophage population 1 in early *KIC* tumors was characterized by the expression of *Fn1*,  
285 *Lyz1*, *Lyz2*, *Ear1*, and *Ear2* as well as *Cd14* (Fig. 4B). Moreover, these macrophages  
286 specifically expressed high levels of the IL1 receptor ligands: *Il1a*, *Il1b*, and *Il1m*. GO analysis  
287 suggested that this macrophage population was involved in healing during inflammation, the  
288 regulation of type I and III hypersensitivities, and antigen processing and presentation (Fig. 4E).  
289 In contrast, macrophage population 2 was noted to express an abundance of chemokines,  
290 including *Ccl2*, *Ccl4*, *Ccl7*, *Ccl8*, and *Ccl12*, as well as many complement-associated genes  
291 (Fig. 4B). Indeed, leukocyte activation, complement activation, and humoral response genes  
292 were the most significantly enriched GO categories in this macrophage population (Fig. 4E).  
293 The third macrophage population expressed *Ccl17* and *Ccr7* and was enriched in ribosomal  
294 small-unit biogenesis, translation, and antigen-processing functions (Fig. 4B and E). Importantly,

295 macrophages in normal mouse pancreas weakly expressed genes found in macrophage  
296 population 2 and 3 from early *KIC* mice, suggesting that the normal pancreas macrophages  
297 could be noncommitted macrophages residing in tissue in the normal organ that are induced to  
298 adopt a distinct phenotype upon tumor initiation (Fig. 4B).

299  
300 The late *KIC* tumor featured two macrophage subpopulations (Fig. 4C). Macrophage population  
301 1 highly expressed genes such as *S100a8* and *Saa3*, which have been shown to be expressed  
302 in lipopolysaccharide-treated monocytes [15]. Moreover, numerous chemokines were elevated  
303 in this population such as *Ccl2*, *Ccl7*, *Ccl9*, *Ccl6*, *Cxcl3*, and *Pf4* (Fig. 4D). GO analysis revealed  
304 this population is likely associated with Stat3 activation, leukocyte chemotaxis, and response to  
305 lipopolysaccharide and inflammatory stimuli (Fig. 4F). These data suggest that macrophage  
306 population 1 was inflammatory in nature. Macrophage population 2 of late *KIC* tumors was rich  
307 in MHC-II antigen presentation molecules: *Cd74*, *H2-Aa*, *H1-Ab1*, *H2-Dma*, *H2-Dmb1*, *H2-*  
308 *Dmb2*, and *H2-Eb1* (Fig. 4D), and GO analysis highlighted antigen presentation and adaptive  
309 immune response pathways as being elevated (Fig. 4F). Consistently, in late *KPFC* tumors, we  
310 also observed two distinct populations of macrophages with similar features (Supplementary  
311 Fig. 3). Interestingly, we did not observe a macrophage population in late tumors that correlated  
312 with macrophage population 1 from the early tumors, suggesting that this population might  
313 undergo negative selection or a differentiation into inflammatory and/or MHC-II-rich  
314 macrophages during tumor progression.

315  
316 We also compared the features of the total macrophage clusters between early and late *KIC*  
317 tumors and observed a substantially enhanced macrophage inflammatory signature as the  
318 tumor progressed (Fig. 4G). A wide variety of inflammatory genes increased, including *Il1a*, *Il1b*,  
319 *Il1r2*, and *Il6*. GO analysis of this gene list highlighted leukocyte chemotaxis and inflammatory  
320 response functions as increased in advanced *KIC* tumors (Fig. 4H). These data suggest that  
321 PDA progression is characterized by an increase in inflammatory features in macrophages.

### 322 323 *Fibroblast heterogeneity during PDA progression*

324 In normal pancreas and early *KIC* tumors, we had identified three distinct populations of  
325 fibroblasts, while in late *KIC* only two fibroblast populations were noted (Fig. 1B-D). To ascertain  
326 the relationship between these fibroblast populations and the dynamics of their phenotypic  
327 changes during PDA progression, we projected fibroblasts from the three analyses onto a single  
328 tSNE plot and applied a graph-based clustering algorithm (Fig. 5A) which revealed three distinct

329 molecular subtypes of fibroblasts in the normal pancreas, early *KIC* tumors, and late *KIC*  
330 tumors. The overlay demonstrates that the normal pancreas and early *KIC* tumors contained all  
331 three fibroblast subtypes while the late *KIC* contained only two (Fig. 5A), confirming our initial  
332 analysis (Fig. 1B-D). Specifically, this analysis demonstrated that fibroblast population 1 (FB1)  
333 and fibroblast population 3 (FB3) found in normal and early *KIC* pancreas were present in the  
334 late *KIC* tumor whereas fibroblast population 2 (FB2) was absent.

335  
336 In the normal pancreas, FB1, FB2, and FB3 made up 35.4%, 56.9% and 7.7% of the total  
337 fibroblasts, respectively (Supplementary Fig.4A). In early *KIC* tumors, although the total  
338 fibroblasts expanded (Fig. 1C), the ratios of each fibroblast population remained similar.  
339 Furthermore, in the late *KIC* tumors, FB1 and FB3 were present in nearly equal proportions of  
340 46.5% and 53.5%, respectively (Supplementary Fig.4A). Each fibroblast population was  
341 characterized by distinct marker genes. For example, FB1 markedly expressed *Cxcl14*, *Ptn*, and  
342 several genes mediating insulin-like growth factor signaling such as *Igf1*, *Igfbp7*, and *Igfbp4*.  
343 FB2 specifically expressed *Nov*, a member of the CCN family of secreted matricellular proteins  
344 [16] as well as *Pi16*, which has been shown to be expressed in fibroblast populations in various  
345 tissue types [17], in addition to *Ly6a* and *Ly6c1*. FB3 showed distinct expression of mesothelial  
346 markers such as *Lrrn4*, *Gpm6a*, *Nkain4*, *Lgals7*, and *Msln* [18] in addition to other genes  
347 previously shown to be expressed in fibroblasts such as *Cav1*, *Cdh11*, and *Gas6* [19-21].

348  
349 Hierarchical clustering of the most significant genes for each fibroblast subtype confirmed the  
350 persistence of FB1 and FB3 during the progression of PDA (Fig. 5B) and that they exist across  
351 different advanced-stage PDA GEMMs (*KPC* and *KPfc*), suggesting a consistent cell of origin.  
352 Interestingly, the gene expression heatmap also indicated that the FB2 population started to  
353 move toward an FB1-like expression profile in early *KIC* tumors, suggesting FB1 and FB2 might  
354 converge into a single CAF population with FB1 features by late invasive disease. Of note, *Ilf6*,  
355 *Ccl2*, *Ccl7*, *Cxcl12*, and *Pdgfra* were expressed in FB1 and FB2 in the normal pancreas and  
356 early *KIC* tumors, and showed greater expression in FB1 of late *KIC* (Fig. 5C). In contrast, the  
357 myofibroblast markers *Acta2* and *Tagln* were expressed by a portion of FB3. These data  
358 support the presence of previously described, mutually exclusive, inflammatory (FB1) and  
359 myofibroblastic (FB3) CAF subtypes [22-24]. Interestingly, FB3 also expressed numerous MHC-  
360 II-associated genes (Fig. 5C). GO analysis suggested that FB1 was involved in an acute phase  
361 response and inflammatory response, FB2 was more associated with physiological functions of  
362 fibroblasts, while FB3 had antigen processing and presentation through the MHC-II pathway

363 and had complement activation functions (Fig. 5D). Furthermore, we analyzed genes that  
364 increased in FB1 and FB3 during PDA progression, and found that FB1 showed a progressive  
365 increase in the expression of genes associated with inflammatory response and chemotaxis  
366 (Fig. 5E and Supplementary Fig. 4B) while FB3 genes displayed increased function on  
367 translation during disease progression, possibly due to enhanced antigen processing activity.  
368 These data suggest that FB1 is an inflammatory population and the inflammatory feature  
369 increases during PDA progression, while FB3 consists of the well-studied myofibroblast  
370 population, and displays an enrichment for class 2 MHC genes.

371  
372 We also found that some genes essentially exclusive to FB3 in the normal and early *KIC*  
373 pancreas became expressed in FB1 and FB3 populations in late *KIC*, marking these genes as  
374 potential global fibroblast markers in advanced PDA. One such gene was *Cdh11* (Fig. 5C). We  
375 validated these data by immunohistochemistry. We found in late *KIC* tumors, stromal staining  
376 for  $\alpha$ SMA and PDGFR $\alpha$  were nearly mutually exclusive, whereas CDH11 showed uniform  
377 staining across all morphologically discernable fibroblasts (Fig. 5F). Taken together, these data  
378 provide the first *in vivo* description of all CAF populations during PDA progression.

379  
380 *Mesenchymal cancer cells and CAFs show evidence of increased epigenetic regulation and*  
381 *super-enhancer activity in advanced PDA*

382 Unique molecular identifiers (UMI) serve to barcode each input mRNA molecule during cDNA  
383 library generation, enabling the determination of initial transcript number even after cDNA library  
384 amplification [25]. We compared UMI counts across all cell types between early and late *KIC*  
385 tumors (Fig. 6A and B). In early lesions, there was a marked increase in UMI in the beta islet  
386 cells (median: 2849, range: 1322-12,857), which might indicate that increased transcriptional  
387 activity is a means by which the endocrine requirements of these cells are met. No other cell  
388 population in the early *KIC* tumor displayed this level of UMI. The early *KIC* cancer cells  
389 displayed a relatively low UMI count (median: 1979, range: 1163-7735). In contrast, the  
390 mesenchymal cancer cell population in the late *KIC* tumor displayed a marked increase in total  
391 UMI count with a median count of 18,334 and range of 4433-50,061 (Fig. 6C). The epithelial  
392 cancer cells in the late *KIC* also displayed an increased UMI, albeit to a far lesser degree than  
393 the mesenchymal cancer cell population (median: 10,368, range: 4940-30,440).

394  
395 We reasoned that the increased transcriptional activity may be associated with increased  
396 activity of epigenetic regulation as well as super-enhancer [26]. BRD4 belongs to the

397 bromodomain family of transcriptional regulators and is a key regulator of super-enhancer  
398 activity [27]. Prior studies have shown that MYC activity is promoted by super-enhancer activity  
399 in PDA [28]. We found that in late *KIC* and *KPc* tumors, *Brd4* was expressed highly in epithelial  
400 and mesenchymal cancer cells while *Myc* was expressed mainly in the mesenchymal cancer  
401 cell population (Fig. 6C, Supplementary Fig. 6). In addition, several genes encoding high-  
402 mobility group A proteins (*Hmga1*, *Hmga1-rs*, *Hmga2*) were markedly expressed in late *KIC* and  
403 *KPc* mesenchymal cancer cells. HMGA proteins are chromatin-associated proteins that  
404 regulate transcriptional activity, including enhancer formation [29]. Lastly, critical  
405 components of the SWI/SNF complex (*Smrbc1*, *Arid1a*, *Arid2*), which are essential in  
406 nucleosome remodeling and transcriptional regulation [30], were also expressed highly in  
407 epithelial and mesenchymal cancer cells of the late *KIC*, but not cancer cells in the early *KIC*  
408 lesion. Taken together, these data provide multiple lines of evidence to suggest that the  
409 transcript load of a more aggressive mesenchymal cancer cell population is increased relative to  
410 cancer cells in early lesions or epithelial cancer cells in advanced PDA.

411  
412 Interestingly, we also noted that fibroblasts in late *KIC* tumors also showed an increased UMI  
413 (median: 14,538, range: 4461-37,497). They also displayed an increased expression of super-  
414 enhancer and other epigenetic transcriptional regulator genes in contrast to fibroblasts from  
415 normal mouse pancreas or early *KIC* pancreas (Fig. 6D). These data are suggestive of  
416 increased super-enhancer and transcriptional activity as normal pancreas fibroblasts become  
417 CAFs.

418  
419 We validated these single-cell RNA expression data using three-color immunohistochemical  
420 analysis of late *KIC* tumors: SOX9 was used as a pan-cancer cell marker, vimentin as a  
421 mesenchymal marker, and BRD4 was a surrogate marker for super-enhancer activity. We  
422 identified positive co-staining for vimentin and Brd4 in CAFs, positive triple-staining  
423 (vimentin+/Sox9+/Brd4+) in mesenchymal cancer cells, and single staining of Sox9 in epithelial  
424 cancer cells that localized to more differentiated, duct-like structures in the advanced tumors  
425 (Fig. 6E). Next, we performed immunohistochemical analysis on 16 whole tumor human  
426 pancreatic cancer sections using an antibody against H3K27ac, a commonly accepted marker  
427 of increased gene regulatory element activity [26, 31]. The malignant epithelium and stromal  
428 fibroblasts were scored separately. These analyses showed markedly positive 3+/3+ staining in  
429 the stromal fibroblasts of all whole tumor sections (Fig. 6F). In 6/16 cancer epithelia the score  
430 was 1+ and 10/16 scored 2+, with no samples showing a cancer epithelial scoring of 3+. Taken

431 together, these are the first data indicating differential super-enhancer activity in distinct tissue  
432 compartments of PDA.

433

#### 434 **Discussion**

435 We have carried out an scRNA-seq of different stages of the *K1C* GEMM, in addition to late  
436 *KP1C* and *KPC* tumors in an effort to agnostically profile the phenotypic changes of cancer and  
437 stromal cells during PDA progression. We have established the emergence of a mesenchymal  
438 cancer cell population as a late-stage tumor event and have identified novel features of different  
439 macrophage and fibroblast populations. This significantly improves our understanding of PDA  
440 progression and lays the foundation for the development of novel therapeutic approaches.

441

442 PDA pathogenesis involves metaplasia of normal acinar cells to ductal epithelium, which in turn  
443 undergo neoplastic transformation in a *KRAS*-driven manner [32]. Malignant ductal epithelium  
444 may then assume more aggressive, mesenchymal features as the disease progresses. In this  
445 study, mesenchymal cancer cell populations were noted in late-stage tumors. Our data support  
446 a model in which mesenchymal features of cancer cells are acquired later in the disease  
447 process, although others have argued that this can be one of the earliest events in PDA [33].  
448 Mesenchymal cancer cell populations have been studied extensively in pancreatic cancer  
449 mouse models and has been shown to be critical to chemotherapeutic resistance while their  
450 contribution to metastasis has been more controversial [34, 35]. Mesenchymal cancer cells  
451 have previously demonstrated an increased protein anabolism and activation of the  
452 endoplasmic reticulum–stress-induced survival pathways in a PDA GEMM [36].

453

454 Indeed, in the late *K1C* model, ribosomal pathways were the most significantly upregulated  
455 pathways in cancer cells (Fig. 2E-H). It is likely that the demand for increased ribosomal activity  
456 stems from high transcriptional activity governed by epigenetic mechanisms in the  
457 mesenchymal cancer cells, as we also saw markedly increased UMI counts in this population  
458 (Fig. 6B). The bromodomain and extraterminal (BET) family of proteins such as BRD4, which is  
459 markedly upregulated in cancer cells and fibroblasts of late-stage PDA (Fig. 6C and D), serve to  
460 recruit regulatory complexes to acetylated histones at enhancer sites, resulting in increased  
461 transcription [37]. Previously, a combination approach using a BET protein inhibitor and a  
462 histone deacetylase inhibitor led to near-complete tumor regression and improved animal  
463 survival in a PDA GEMM [28]. Super-enhancer activation has recently been shown to be  
464 fundamental in the pathophysiology of a variety of neoplasms [38] and is intimately associated

465 with *Hmg2a* in PDA, as super-enhancer attenuation has been demonstrated to downregulate  
466 *Hmg2a* expression and the growth of PDA cells in a three-dimensional *in vitro* model [39]. Our  
467 study is the first to demonstrate that these epigenetic regulatory mechanisms in PDA are  
468 present in specific tissue compartments, namely mesenchymal cancer cells and CAFs. Future  
469 efforts to target super-enhancer activity in PDA should consider distinct tissue compartments  
470 governing the sensitivity and resistance to novel therapeutics.

471  
472 Our data revealed two molecular subtypes of macrophages in advanced PDA (Fig. 4). One  
473 expressed numerous chemokine and inflammation-associated genes while the other was rich in  
474 MHC-II-associated genes. In a previous study, MHC-II-positive macrophages were isolated  
475 from orthotopic breast tumors and highly expressed CCL17, consistent with our data [40]. In  
476 parallel with our study, MHC-II<sup>low</sup> macrophages were found to be highly enriched for numerous  
477 chemokines. Moreover, in an orthotopic hepatoma mouse model, an early MHC-II<sup>+</sup> macrophage  
478 population appeared to suppress tumor growth but an MHC-II<sup>low</sup> macrophage population  
479 became the predominant macrophage population as the tumor progressed, resulting in a  
480 protumor phenotype [41]. Nonetheless, to confirm their pathophysiological significance,  
481 functional studies are required in which inducible selective ablation [42] is performed on the two  
482 late-stage PDA macrophage subpopulations using specific markers we have identified in this  
483 study. Zhu and colleagues [43] have shown that bone marrow-derived monocytes make up  
484 approximately 80% of MHC-II-positive macrophages in a PDA GEMM whereas MHC-II-  
485 negative macrophages in normal pancreas and PDA were shown to be maintained  
486 independently of monocyte contributions. Monocyte-independent MHC-II<sup>low</sup> tissue resident  
487 macrophages expanded during tumor progression and contributed to PDA growth and survival.  
488 Conversely, Sanford and colleagues [44] have shown that monocytes can give rise to a pro-  
489 inflammatory macrophage population in a PDA mouse model, which when antagonized with  
490 neutralizing antibodies against CCR2, resulted in decreased tumor growth and reduced  
491 metastases *in vivo* [44]. These data highlight the need for an scRNA-seq study on macrophage  
492 populations in PDA GEMMs with labelled bone marrow replacement to reconcile these  
493 discrepancies.

494  
495 More importantly, in the studies of tumor-associated macrophages, inflammatory chemokines  
496 are commonly used to indicate an M1 type of macrophage, which are normally associated with  
497 immune-stimulatory functions. Nevertheless, our study indicates that a distinct M1/M2  
498 macrophage phenotype is not readily discernable at the single-cell level. Instead, as PDA

499 progresses, an inflammatory feature is substantially increased, and this accompanies an  
500 increase of an important M2 macrophage marker, ARG1 (Fig. 4F and H). This raises questions  
501 on the M1/M2 classification system, as the inflammatory feature is associated with the  
502 progression of PDA. Future studies should focus on the function of these inflammatory  
503 macrophages in PDA in addition to validating markers for macrophage classification.

504

505 While numerous studies have generally shown that CAFs are tumor-promoting in the biology of  
506 PDA and other carcinomas [45, 46], recent studies have found that the function of CAFs in PDA  
507 biology are more varied. Özdemir and colleagues [42] demonstrated that the depletion of  
508  $\alpha$ SMA<sup>+</sup> cells from the microenvironment in a PDA GEMM resulted in shortened survival and  
509 poorly differentiated tumors [42], and low myofibroblast tumor content was shown to be  
510 associated with worse survival in human PDA sections. These data prompted a paradigm shift  
511 whereby certain CAFs may function to constrain, rather than promote, PDA. Moreover, until  
512 recently, the molecular heterogeneity of CAFs in PDA has not been well-appreciated. The  
513 primary attempt to characterize fibroblast heterogeneity in PDA demonstrated that mouse  
514 pancreatic stellate cells (PSCs) could be induced to express  $\alpha$ SMA *in vitro* when directly co-  
515 cultured with primary mouse PDA cells in an organoid co-culture system [22]. These  
516 myofibroblastic CAFs were designated as “myCAF.” This was distinct from IL6<sup>+</sup> fibroblasts that  
517 were produced *in vitro* when PSCs were indirectly co-cultured with mouse PDA organoids  
518 through a semi-permeable membrane. The IL6<sup>+</sup> fibroblasts were also positive for PDGFR $\alpha$  and  
519 numerous other cytokines and therefore termed inflammatory CAFs or “iCAF.” The  
520 immunohistochemistry of human and mouse PDA tissue showed distal IL6<sup>+</sup> stroma as a distinct  
521 population from the peritumoral  $\alpha$ SMA<sup>+</sup> stroma. Subsequent studies in PDA GEMMs  
522 demonstrated that the iCAF population can mediate pro-tumorigenic properties and is a  
523 potential therapeutic target in an attempt to sensitize PDA to immunotherapeutic strategies [23,  
524 24].

525

526 Our current study is the first to demonstrate the existence of three distinct molecular subtypes of  
527 fibroblasts in the normal mouse pancreas, which in turn gave rise to two distinct subtypes of  
528 CAFs that were largely conserved across three different PDA GEMMs. We noted that FB1  
529 expressed insulin-like growth factor signaling genes (*Igf1*, *Igf2*, and *Igf1*) in addition to  
530 *Pdgfra*, *Cxcl12*, *Il6*, and several other cytokines (*Ccl11*, *Ccl7*, *Ccl2*, and *Csf1*). We propose that  
531 our FB1 population is the previously described iCAF population and hence likely pro-  
532 tumorigenic. Conversely, the FB3 population was positive for the myofibroblast markers *Acta2*



533 and *Tagln*, and therefore most closely represents the previously described myCAF population.  
534 Importantly, our agnostic approach did not identify any further putative CAF populations and so  
535 we support the two-CAF model proposed by Öhlund and colleagues [22].

536

537 In summary, this report systematically outlines the cellular landscape during the progression of  
538 PDA and highlights the cellular heterogeneity in PDA pathogenesis. As such, future targeted  
539 therapeutic strategies should be developed with their intended target subpopulation in mind.

540

541 **Address requests for reprints to:** Rolf A Brekken, 6000 Harry Hines Blvd., Dallas, TX 75390-  
542 8593. Email: [rolf.brekken@utsouthwestern.edu](mailto:rolf.brekken@utsouthwestern.edu).

543

#### 544 **Acknowledgements**

545 We thank the McDermott Center Next-Generation Sequencing Core at UT Southwestern for  
546 preparing and sequencing the single-cell RNA-seq libraries. We thank Dr Jeon Lee (UT  
547 Southwestern) for assistance in pre-processing of scRNA-seq data. We also thank Dave Primm  
548 of the UT Southwestern Department of Surgery for help in editing this article.

549

#### 550 **Conflicts of interest**

551 The authors have no conflicts of interest to report.

552

#### 553 **Ethics approval**

554 Mice were used in this study according to UT Southwestern institutional guidelines and  
555 approved by the institutional animal care and use committee at UT Southwestern Medical  
556 Center. All human samples were procured through the UT Southwestern tissue management  
557 shared resource and approved through the UT Southwestern institutional review board.

558

#### 559 **Data sharing statement**

560 There are no additional unpublished data from this study.

561

#### 562 **References:**

- 563 1. *Pancreatic cancer*. Nature Reviews Disease Primers, 2016. **2**: p. 16023.  
564 2. Mei, L., W. Du, and W.W. Ma, *Targeting stromal microenvironment in pancreatic ductal*  
565 *adenocarcinoma: controversies and promises*. J Gastrointest Oncol, 2016. **7**(3): p. 487-94.  
566 3. Valkenburg, K.C., A.E. de Groot, and K.J. Pienta, *Targeting the tumour stroma to improve cancer*  
567 *therapy*. Nat Rev Clin Oncol, 2018. **15**(6): p. 366-381.

- 568 4. Potter, S.S., *Single-cell RNA sequencing for the study of development, physiology and disease*.  
569 Nat Rev Nephrol, 2018. **14**(8): p. 479-492.
- 570 5. Ostapoff, K.T., et al., *Neutralizing murine TGFbetaR2 promotes a differentiated tumor cell*  
571 *phenotype and inhibits pancreatic cancer metastasis*. Cancer Res, 2014. **74**(18): p. 4996-5007.
- 572 6. Hingorani, S.R., et al., *Preinvasive and invasive ductal pancreatic cancer and its early detection in*  
573 *the mouse*. Cancer Cell, 2003. **4**(6): p. 437-50.
- 574 7. Hingorani, S.R., et al., *Trp53R172H and KrasG12D cooperate to promote chromosomal instability*  
575 *and widely metastatic pancreatic ductal adenocarcinoma in mice*. Cancer Cell, 2005. **7**(5): p. 469-  
576 83.
- 577 8. Butler, A., et al., *Integrating single-cell transcriptomic data across different conditions,*  
578 *technologies, and species*. Nat Biotechnol, 2018. **36**(5): p. 411-420.
- 579 9. Huang da, W., B.T. Sherman, and R.A. Lempicki, *Systematic and integrative analysis of large*  
580 *gene lists using DAVID bioinformatics resources*. Nat Protoc, 2009. **4**(1): p. 44-57.
- 581 10. Zheng, G.X., et al., *Massively parallel digital transcriptional profiling of single cells*. Nat Commun,  
582 2017. **8**: p. 14049.
- 583 11. Kopp, J.L., et al., *Identification of Sox9-dependent acinar-to-ductal reprogramming as the*  
584 *principal mechanism for initiation of pancreatic ductal adenocarcinoma*. Cancer Cell, 2012.  
585 **22**(6): p. 737-50.
- 586 12. Weniger, M., K.C. Honselmann, and A.S. Liss, *The Extracellular Matrix and Pancreatic Cancer: A*  
587 *Complex Relationship*. Cancers (Basel), 2018. **10**(9).
- 588 13. Shen, W., et al., *TGF-beta in pancreatic cancer initiation and progression: two sides of the same*  
589 *coin*. Cell Biosci, 2017. **7**: p. 39.
- 590 14. Gruber, R., et al., *YAP1 and TAZ Control Pancreatic Cancer Initiation in Mice by Direct Up-*  
591 *regulation of JAK-STAT3 Signaling*. Gastroenterology, 2016. **151**(3): p. 526-39.
- 592 15. Gao, J.J., et al., *Regulation of gene expression in mouse macrophages stimulated with bacterial*  
593 *CpG-DNA and lipopolysaccharide*. J Leukoc Biol, 2002. **72**(6): p. 1234-45.
- 594 16. Leask, A. and D.J. Abraham, *All in the CCN family: essential matricellular signaling modulators*  
595 *emerge from the bunker*. J Cell Sci, 2006. **119**(Pt 23): p. 4803-10.
- 596 17. Regn, M., et al., *Peptidase inhibitor 16 is a membrane-tethered regulator of chemerin processing*  
597 *in the myocardium*. J Mol Cell Cardiol, 2016. **99**: p. 57-64.
- 598 18. Li, Y., J. Wang, and K. Asahina, *Mesothelial cells give rise to hepatic stellate cells and*  
599 *myofibroblasts via mesothelial-mesenchymal transition in liver injury*. Proc Natl Acad Sci U S A,  
600 2013. **110**(6): p. 2324-9.
- 601 19. Simpkins, S.A., et al., *Clinical and functional significance of loss of caveolin-1 expression in breast*  
602 *cancer-associated fibroblasts*. J Pathol, 2012. **227**(4): p. 490-8.
- 603 20. Chang, S.K., et al., *Cadherin-11 regulates fibroblast inflammation*. Proc Natl Acad Sci U S A, 2011.  
604 **108**(20): p. 8402-7.
- 605 21. Kanzaki, R., et al., *Gas6 derived from cancer-associated fibroblasts promotes migration of Axl-*  
606 *expressing lung cancer cells during chemotherapy*. Sci Rep, 2017. **7**(1): p. 10613.
- 607 22. Ohlund, D., et al., *Distinct populations of inflammatory fibroblasts and myofibroblasts in*  
608 *pancreatic cancer*. J Exp Med, 2017. **214**(3): p. 579-596.
- 609 23. Feig, C., et al., *Targeting CXCL12 from FAP-expressing carcinoma-associated fibroblasts*  
610 *synergizes with anti-PD-L1 immunotherapy in pancreatic cancer*. Proc Natl Acad Sci U S A, 2013.  
611 **110**(50): p. 20212-7.
- 612 24. Djurec, M., et al., *Saa3 is a key mediator of the protumorigenic properties of cancer-associated*  
613 *fibroblasts in pancreatic tumors*. Proc Natl Acad Sci U S A, 2018. **115**(6): p. E1147-E1156.
- 614 25. Kivioja, T., et al., *Counting absolute numbers of molecules using unique molecular identifiers*. Nat  
615 Methods, 2011. **9**(1): p. 72-4.

- 616 26. Hnisz, D., et al., *Super-enhancers in the control of cell identity and disease*. Cell, 2013. **155**(4): p.  
617 934-47.
- 618 27. Loven, J., et al., *Selective inhibition of tumor oncogenes by disruption of super-enhancers*. Cell,  
619 2013. **153**(2): p. 320-34.
- 620 28. Mazur, P.K., et al., *Combined inhibition of BET family proteins and histone deacetylases as a*  
621 *potential epigenetics-based therapy for pancreatic ductal adenocarcinoma*. Nat Med, 2015.  
622 **21**(10): p. 1163-71.
- 623 29. Ozturk, N., et al., *HMGA proteins as modulators of chromatin structure during transcriptional*  
624 *activation*. Front Cell Dev Biol, 2014. **2**: p. 5.
- 625 30. Masliah-Planchon, J., et al., *SWI/SNF chromatin remodeling and human malignancies*. Annu Rev  
626 Pathol, 2015. **10**: p. 145-71.
- 627 31. Mack, S.C., et al., *Therapeutic targeting of ependymoma as informed by oncogenic enhancer*  
628 *profiling*. Nature, 2018. **553**(7686): p. 101-105.
- 629 32. Reichert, M. and A.K. Rustgi, *Pancreatic ductal cells in development, regeneration, and*  
630 *neoplasia*. J Clin Invest, 2011. **121**(12): p. 4572-8.
- 631 33. Rhim, A.D., et al., *EMT and dissemination precede pancreatic tumor formation*. Cell, 2012. **148**(1-  
632 2): p. 349-61.
- 633 34. Izumiya, M., et al., *Chemoresistance is associated with cancer stem cell-like properties and*  
634 *epithelial-to-mesenchymal transition in pancreatic cancer cells*. Anticancer Res, 2012. **32**(9): p.  
635 3847-53.
- 636 35. Zheng, X., et al., *Epithelial-to-mesenchymal transition is dispensable for metastasis but induces*  
637 *chemoresistance in pancreatic cancer*. Nature, 2015. **527**(7579): p. 525-530.
- 638 36. Genovese, G., et al., *Synthetic vulnerabilities of mesenchymal subpopulations in pancreatic*  
639 *cancer*. Nature, 2017. **542**(7641): p. 362-366.
- 640 37. Shi, J. and C.R. Vakoc, *The mechanisms behind the therapeutic activity of BET bromodomain*  
641 *inhibition*. Mol Cell, 2014. **54**(5): p. 728-36.
- 642 38. Sengupta, S. and R.E. George, *Super-Enhancer-Driven Transcriptional Dependencies in Cancer*.  
643 Trends Cancer, 2017. **3**(4): p. 269-281.
- 644 39. Sahai, V., et al., *BET bromodomain inhibitors block growth of pancreatic cancer cells in three-*  
645 *dimensional collagen*. Mol Cancer Ther, 2014. **13**(7): p. 1907-17.
- 646 40. Movahedi, K., et al., *Different tumor microenvironments contain functionally distinct subsets of*  
647 *macrophages derived from Ly6C(high) monocytes*. Cancer Res, 2010. **70**(14): p. 5728-39.
- 648 41. Wang, B., et al., *Transition of tumor-associated macrophages from MHC class II(hi) to MHC class*  
649 *II(low) mediates tumor progression in mice*. BMC Immunol, 2011. **12**: p. 43.
- 650 42. Ozdemir, B.C., et al., *Depletion of Carcinoma-Associated Fibroblasts and Fibrosis Induces*  
651 *Immunosuppression and Accelerates Pancreas Cancer with Reduced Survival*. Cancer Cell, 2015.  
652 **28**(6): p. 831-833.
- 653 43. Zhu, Y., et al., *Tissue-Resident Macrophages in Pancreatic Ductal Adenocarcinoma Originate*  
654 *from Embryonic Hematopoiesis and Promote Tumor Progression*. Immunity, 2017. **47**(3): p. 597.
- 655 44. Sanford, D.E., et al., *Inflammatory monocyte mobilization decreases patient survival in*  
656 *pancreatic cancer: a role for targeting the CCL2/CCR2 axis*. Clin Cancer Res, 2013. **19**(13): p.  
657 3404-15.
- 658 45. Olumi, A.F., et al., *Carcinoma-associated fibroblasts direct tumor progression of initiated human*  
659 *prostatic epithelium*. Cancer Res, 1999. **59**(19): p. 5002-11.
- 660 46. Hwang, R.F., et al., *Cancer-associated stromal fibroblasts promote pancreatic tumor progression*.  
661 Cancer Res, 2008. **68**(3): p. 918-26.

662



664 **Figure Legends**

665

666 **Figure 1. Cellular heterogeneity during PDA progression.** A) Representative H&E sections  
667 of the normal pancreas, early *KIC* lesion, and late *KIC* lesion (magnification: 20x). B) tSNE plot  
668 of normal pancreas displaying 2354 cells comprising 8 distinct cell populations. C) tSNE plot of  
669 the early *KIC* lesion displaying 3524 cells containing 9 cells types with the emergence of the  
670 cancer cell population. D) tSNE plot of the late *KIC* tumor showing 804 cells and 7 distinct  
671 populations. Stacked violin plots of representative marker gene expression for each of the cell  
672 populations seen in the E) normal pancreas, F) early *KIC* lesions, and G) late *KIC* lesions.

673

674 **Figure 2. Analysis of early and late *KIC* cancer cell populations demonstrate the**  
675 **emergence of the mesenchymal cancer cell population as a late event.** A) tSNE plots of the  
676 early *KIC* lesion demonstrated the expression of known epithelial markers in the sole cancer  
677 population (black outline). Mesenchymal markers were absent in this population. B) tSNE plots  
678 demonstrating the emergence of two cancer cell populations in the late *KIC* tumor. One cancer  
679 cell population expressed the epithelial markers (smaller population outlined in black) and a  
680 second expressed the mesenchymal markers (larger population outlined in black). C) Violin  
681 plots showing the high expression of epithelial markers in the early *KIC* cancer cell population  
682 and late *KIC* epithelial cancer cell population but not in the mesenchymal population.  
683 Mesenchymal markers were overexpressed in the mesenchymal cancer cell population but not  
684 in the early *KIC* or late *KIC* epithelial cancer cell populations. D) Single-cell profiling heatmap of  
685 all early and late *KIC* cancer cells displaying differentially expressed genes between the three  
686 cell populations. Gene names are listed in the boxes on the far right of the heatmap. Each  
687 column represents an individual cell and each row is the gene expression value for a single  
688 gene. E) KEGG pathway analysis and F) gene ontology analysis comparing all early *KIC* cancer  
689 cells against all late *KIC* cancer cells. Red bars are increased categories and blue bars are  
690 decreased categories. G) KEGG and BIOCARTA pathway analysis and H) gene ontology  
691 analysis comparing all early *KIC* cancer cells against only the late *KIC* epithelial cells. Red bars  
692 are categories increased in the late *KIC* and blue bars are decreased in the late *KIC*. (\*\*\*\* $P <$   
693  $0.0001$ , \*\*\* $P < 0.001$ , \*\* $P < 0.01$ , \* $P < 0.05$ ).

694

695 **Figure 3. Comparison between cancer cells of *KIC* and *KPfc* tumors.** A) tSNE plot of the  
696 late *KPfc* lesion displaying 2893 cells and 8 distinct cell populations. B) Stacked violin plots  
697 showing representative marker gene expression for each of the cell populations seen in the late

698 *KPfc* lesion. C) Single-gene tSNE plots of the *KPfc* tumor displaying the presence of epithelial  
699 markers (*Ocln*, *Gjb1*, and *Tjp1*) in the epithelial cancer cell population (upper black outlined  
700 population) and mesenchymal markers in the mesenchymal cancer cell population (lower black  
701 outlined population). D) Violin plots showing the overexpression of epithelial markers in the  
702 epithelial cancer cell population and mesenchymal markers in the mesenchymal cancer cell  
703 population. E) KEGG and BIOCARTA pathway analysis comparing all late *KIC* to all late *KPfc*  
704 cancer cells. Red bars are categories increased in the late *KIC* and blue bars are increased in  
705 *KPfc*. F) Single-cell profiling heatmap comparing all cancer cells in the *KIC* versus all cancer  
706 cells in the *KPfc*. Each column represents an individual cell and each row is the gene  
707 expression value for a single gene. (\*\*\*\* $P < 0.0001$ , \*\*\* $P < 0.001$ , \*\* $P < 0.01$ , \* $P < 0.05$ ).

708

709 **Figure 4. scRNA-seq analysis of *KIC* tumor progression reveals multiple subpopulations**

710 **of macrophages.** A) tSNE plot of three macrophage subpopulations in the early *KIC* tumor. B)  
711 Heatmap depicting the 30 top significantly overexpressed genes in each of the three early *KIC*  
712 macrophage subpopulations. Macrophages from the normal pancreas are displayed (far left  
713 group). Each column represents an individual cell and each row is the gene expression value for  
714 a single gene. C) tSNE plot representation of two macrophage subpopulations in the late *KIC*.  
715 D) Heatmap depicting the 30 top significantly overexpressed genes in each of the two late *KIC*  
716 macrophage subpopulations. Each column represents an individual cell and each row is the  
717 gene expression value for a single gene. E) GO analysis of biological processes in the three  
718 macrophage subpopulations seen in the early *KIC*. F) GO analysis of biological processes in the  
719 two macrophage subpopulations of the late *KIC*. G) Violin plots of the expression of  
720 inflammatory genes and *Arg1* comparing the macrophages in early and late *KIC*. H) GO  
721 analysis of biological processes that are upregulated in the late *KIC* macrophages relative to  
722 early *KIC* macrophages. (\*\*\*\* $P < 0.0001$ , \*\*\* $P < 0.001$ , \*\* $P < 0.01$ , \* $P < 0.05$ ).

723

724 **Figure 5. Analysis of fibroblasts during PDA progression reveals multiple molecular**

725 **subtypes.** A) All fibroblasts from the normal pancreas, early *KIC* tumors, and late *KIC* tumors  
726 were projected onto a single tSNE plot with the FB1, FB2, and FB3 populations distinguished by  
727 pink, orange, and brown, respectively (upper left panel). Normal pancreas fibroblasts were  
728 highlighted in red (upper right panel), early *KIC* fibroblasts in green (lower left panel) and late  
729 *KIC* fibroblasts in blue (lower right panel). Normal pancreas and early *KIC* contained fibroblasts  
730 in all three groups whereas the late *KIC* had only FB1 and FB3. B) Heatmap displaying the top  
731 significant genes (cutoff:  $P < 10^{-40}$ ) for each of the three fibroblast populations. Thirty random

732 cells from each fibroblast population are displayed. All three late-cancer GEMMs (late *KIC*,  
733 *KPfc*, and *KPC*) display only FB1 and FB3 fibroblast populations. C) Violin plots demonstrating  
734 representative marker genes for each fibroblast subtype: FB1 overexpressed cytokines and  
735 *Pdgfra*. FB3 overexpressed mesothelial markers, myofibroblast markers, MHC-II molecules and  
736 *Cdh11*. D) Gene ontology analysis of the top biological processes in each of the three fibroblast  
737 subtypes. E) GO analysis of genes upregulated in late FB1 and FB3 compared to early FB1 and  
738 FB3 in *KIC*, respectively. F) Immunohistochemical analysis of PDGFR $\alpha$ ,  $\alpha$ SMA, and CDH11  
739 stained serially on the same slide. Colors were deconvoluted into a single color layer. PDGFR $\alpha$   
740 and  $\alpha$ SMA staining were mutually exclusive, whereas CDH11 was a pan-CAF marker  
741 (magnification: 20x). (\*\*\*\* $P < 0.0001$ , \*\*\* $P < 0.001$ , \*\* $P < 0.01$ , \* $P < 0.05$ ).

742  
743 **Figure 6. Analysis of transcriptional activity in different stages of PDA reveals differential**  
744 **epigenetic and super-enhancer activity in distinct tissue compartments.** A) tSNE plot of  
745 UMI counts in the early and B) late *KIC*. C) Violin plots of epigenetic regulatory genes in the  
746 cancer cell populations of normal pancreas, early *KIC*, and late *KIC*. D) Violin plots of epigenetic  
747 regulator genes in the normal, early fibroblast, and late fibroblast populations showing their  
748 upregulation in CAFs. E) Sequential triple immunohistochemical staining on the same late *KIC*  
749 tumor section for cancer cells (SOX9, pink), mesenchymal cells (vimentin, brown) and super-  
750 enhancer activity (BRD4, blue). Well-differentiated ductal epithelium stained solely for SOX9  
751 (green outline). Mesenchymal cancer cells (blue arrows) and CAFs (brown arrows) both show  
752 co-staining with BRD4. F) Immunohistochemical analysis of human PDA whole tissue sections  
753 using the H3K27ac antibody. These representative figures from four different human PDAs  
754 demonstrate the 3+/3+ staining in the stromal fibroblasts (red arrows) with 1-2+ staining in the  
755 cancer epithelium (magnification: 20x).

756  
757

758 **Supplementary Figure 1.** Ultrasound image of early *KIC* mouse (39 days old), 1 day prior to  
759 sacrifice. Two-dimensional measurement of the neoplastic lesion is denoted in teal (1.10 mm x  
760 0.82 mm). V = ventral surface, D = dorsal surface, S = spleen.

761

762 **Supplementary Figure 2.** A) tSNE plot of *KPC* (6 months) displaying 1007 cells making up 8  
763 distinct cell populations as indicated. B) Stacked violin plots of marker genes and UMI for each  
764 of the 8 *KPC* populations.

765

766 **Supplementary Figure 3.** Heatmap depicting gene expression levels (horizontal) of single cells  
767 (vertical) in the macrophage populations of the *KPFC* GEMMs. Proinflammatory (Macrophage 1)  
768 and MHC-II-rich (Macrophage 2) subtypes are noted below the heatmap.

769

770 **Supplementary Figure 4.** A) The relative proportions of FB1, FB2, and FB3 in the normal  
771 mouse pancreas, early *KIC* lesions, and late *KIC* lesions. B) Genes increased most significantly  
772 in the FB1 and FB3 populations as the normal pancreas progressed to early *KIC* and then to  
773 late *KIC*.

774

775 **Supplementary Figure 5.** Violin plots depicting gene expression of *Myc* and epigenetic  
776 regulatory genes in the *KPFC* epithelial and mesenchymal cancer cell populations.

777

778



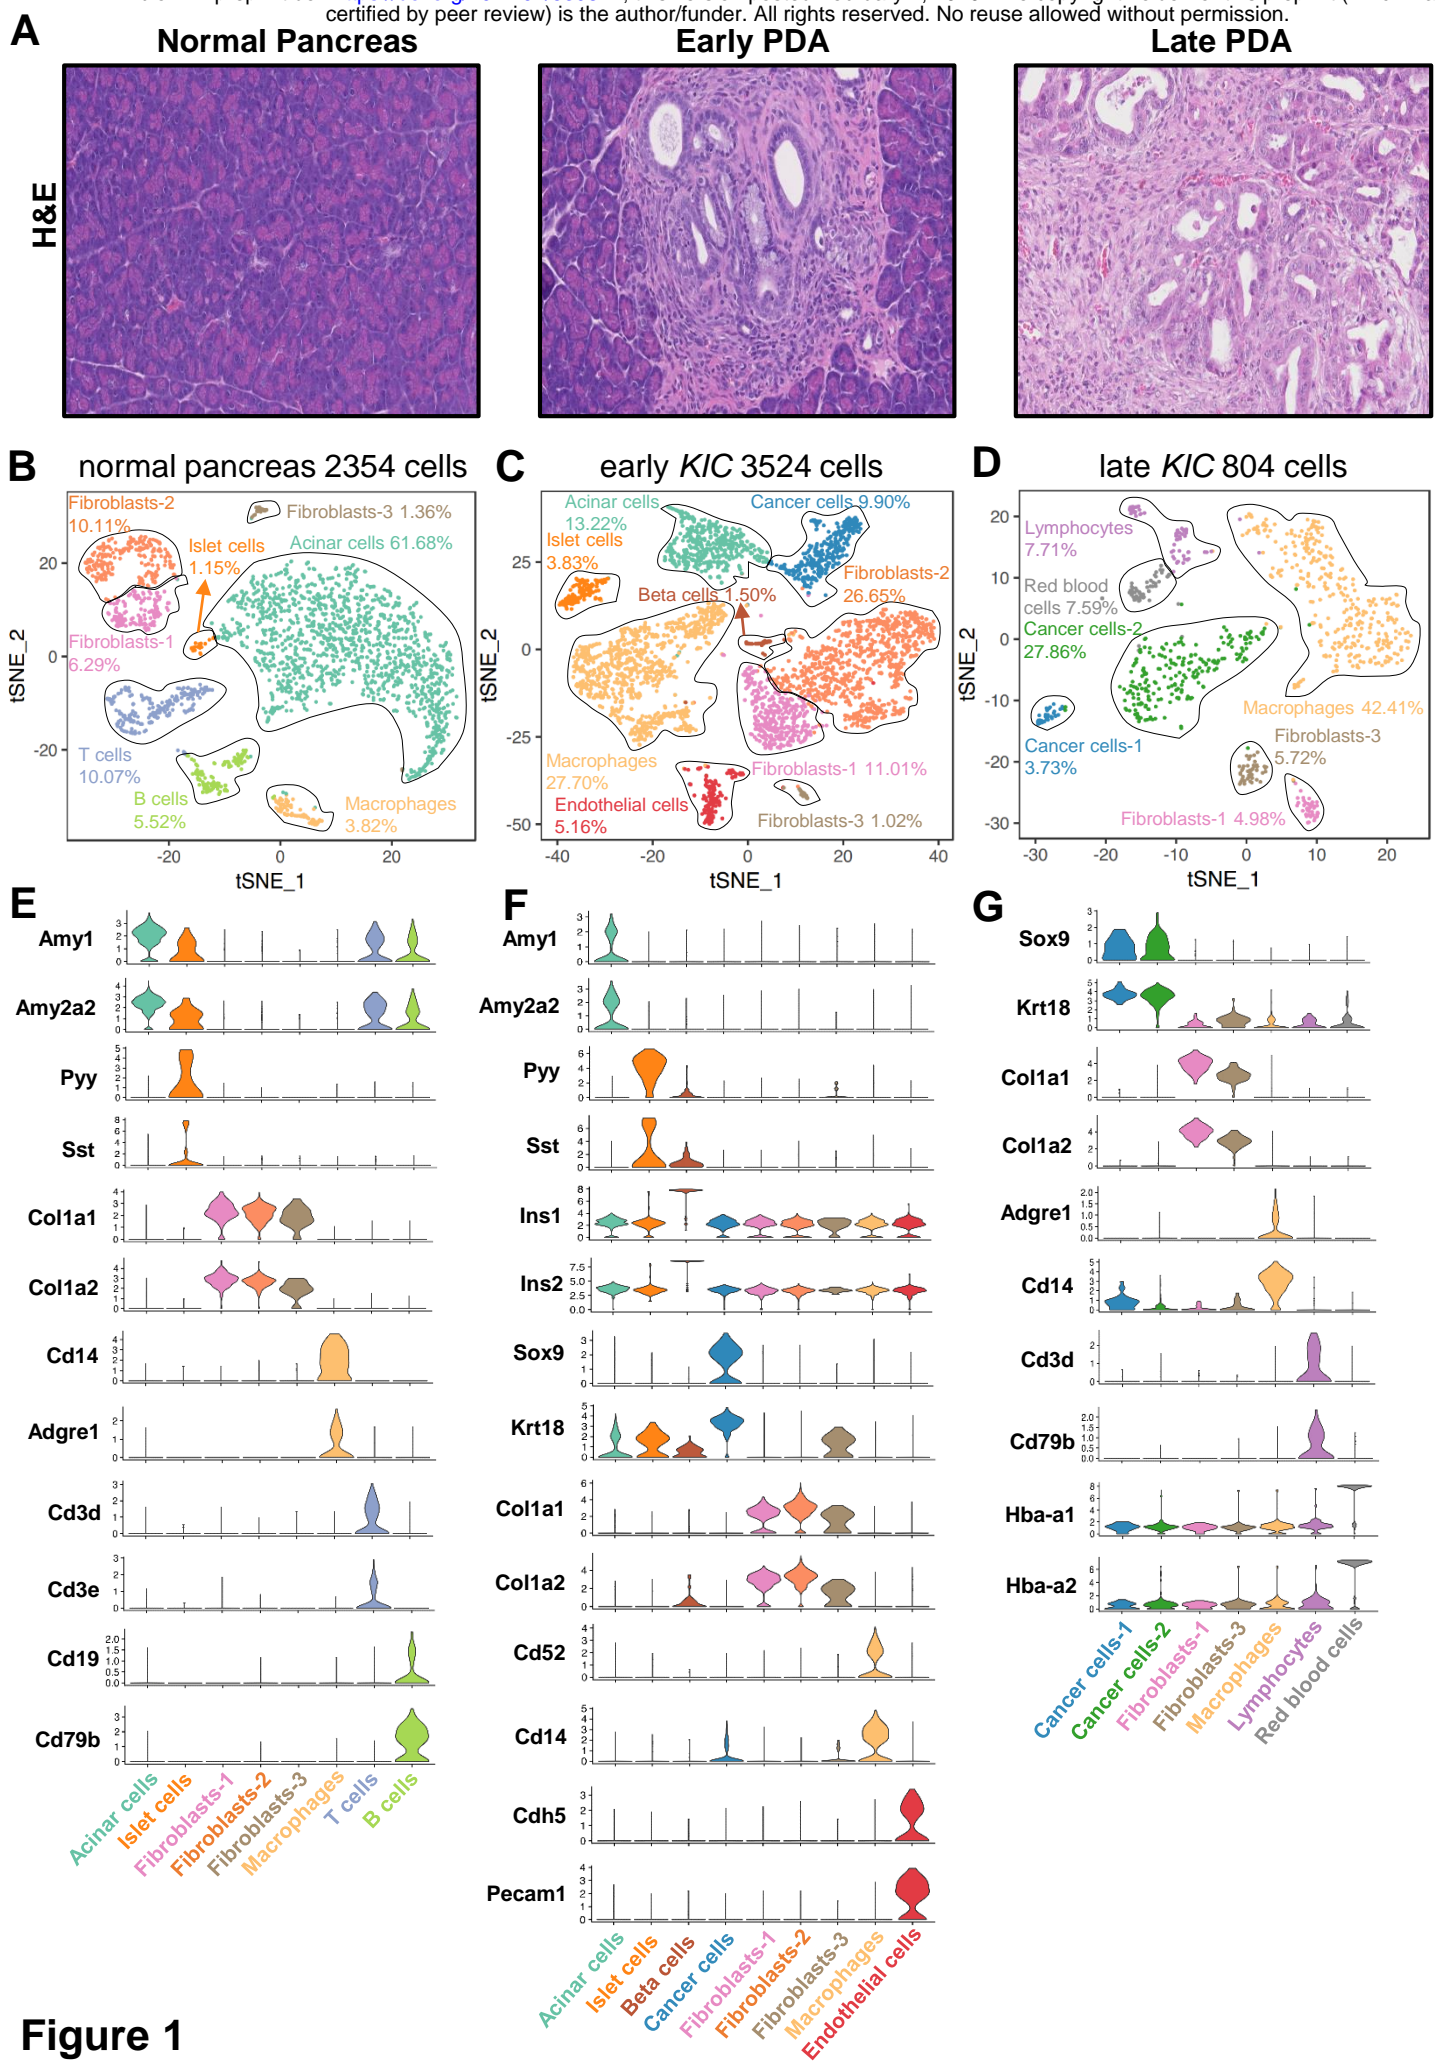

**Figure 1**

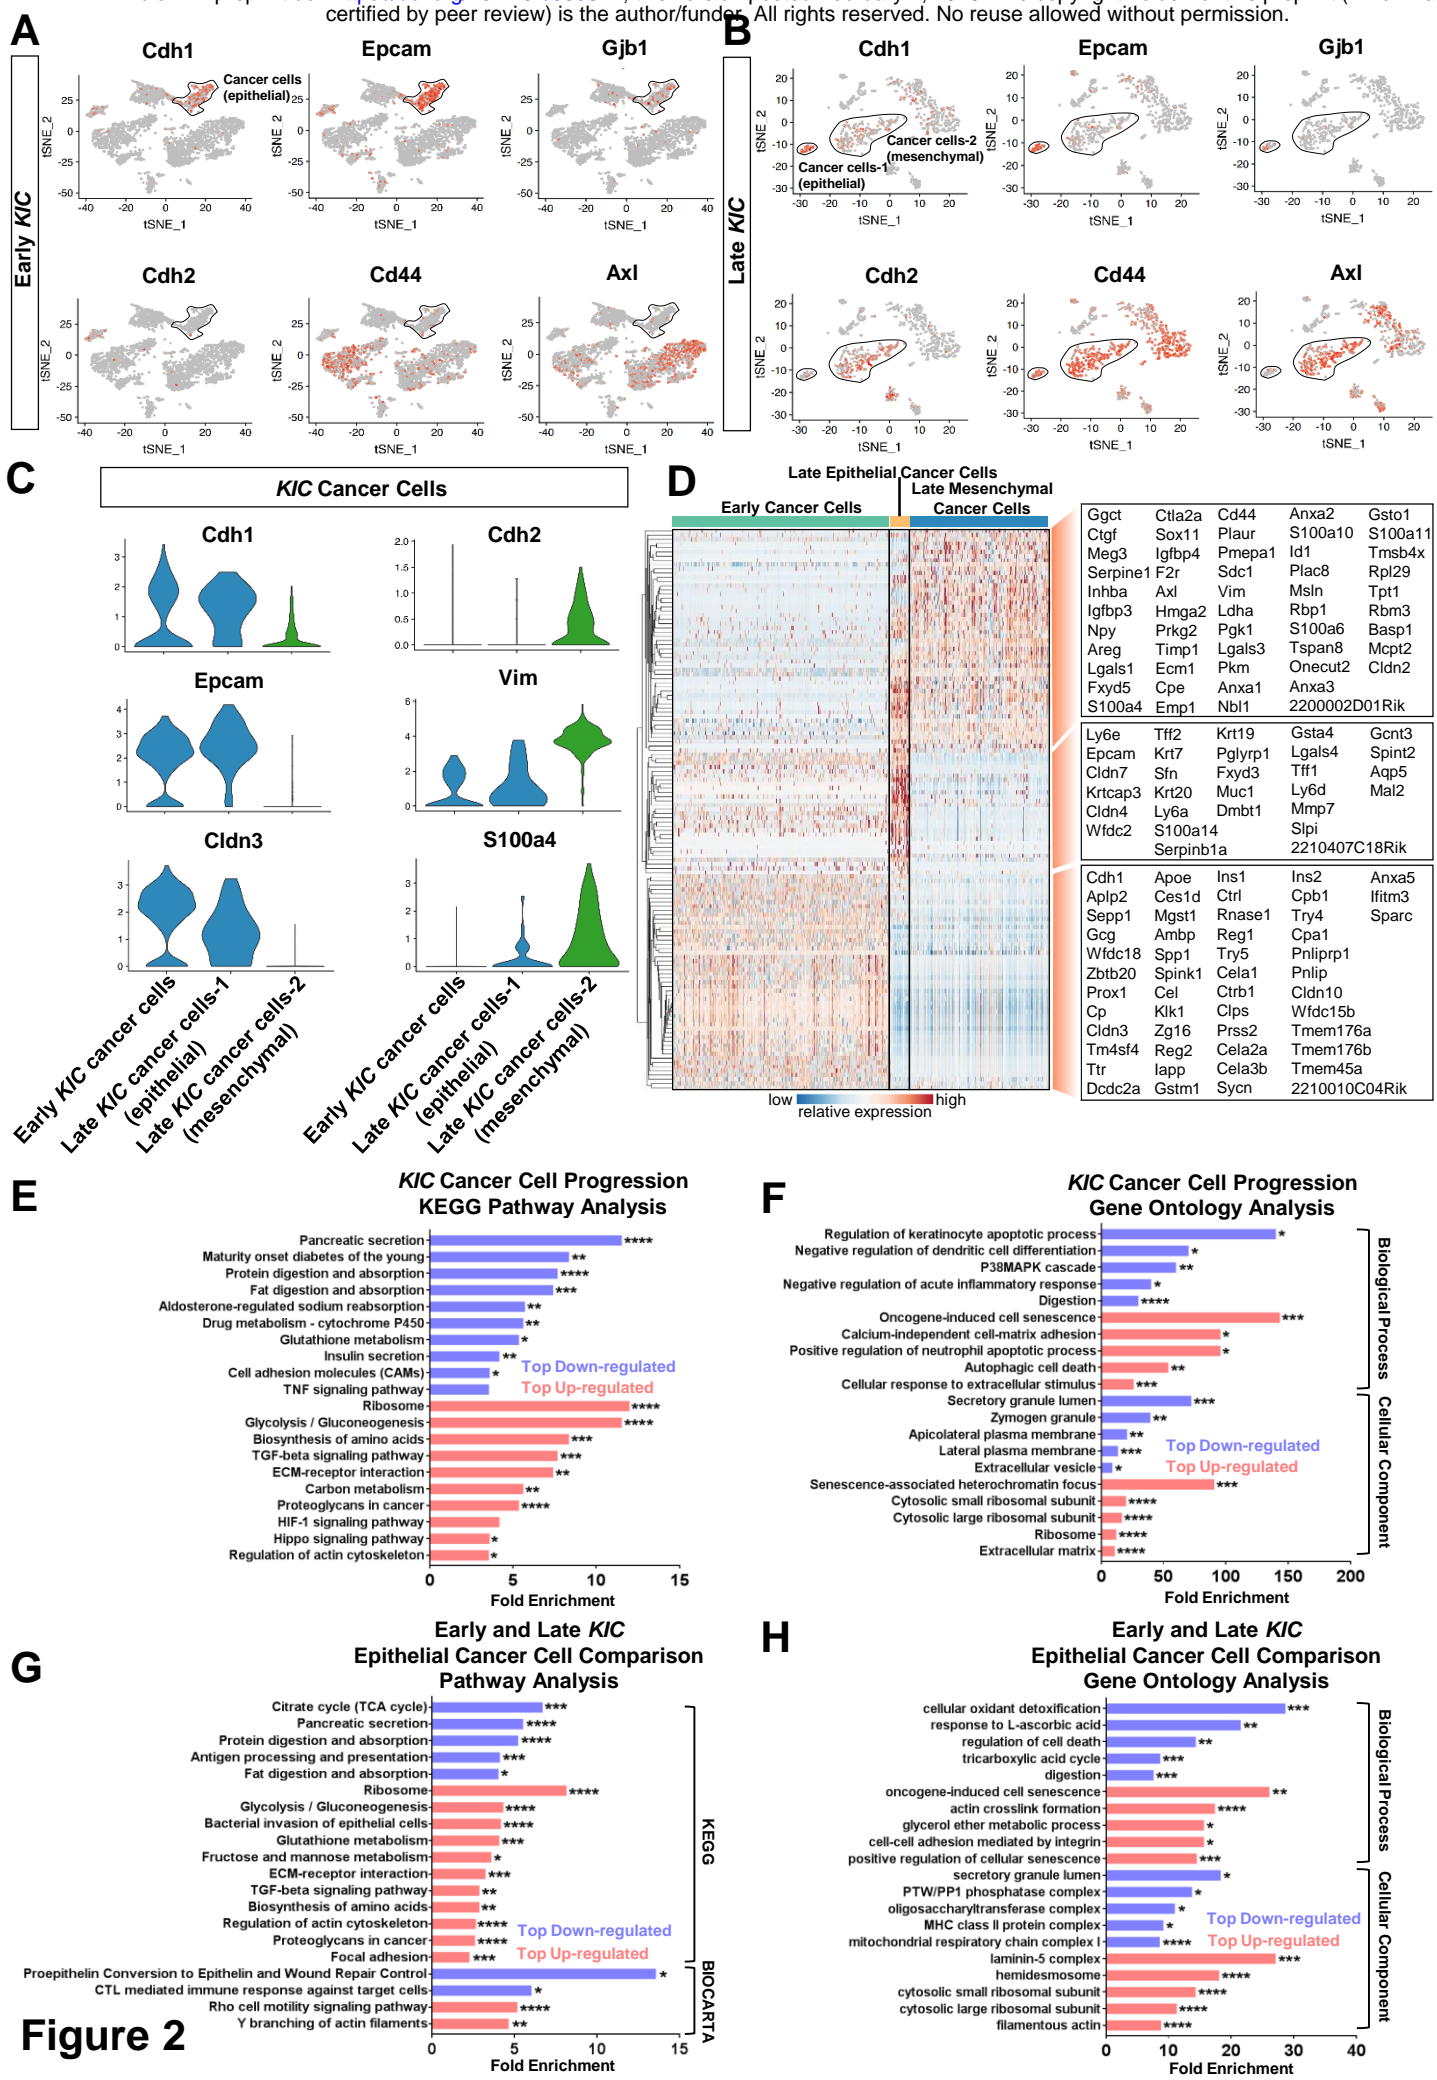

**Figure 2**

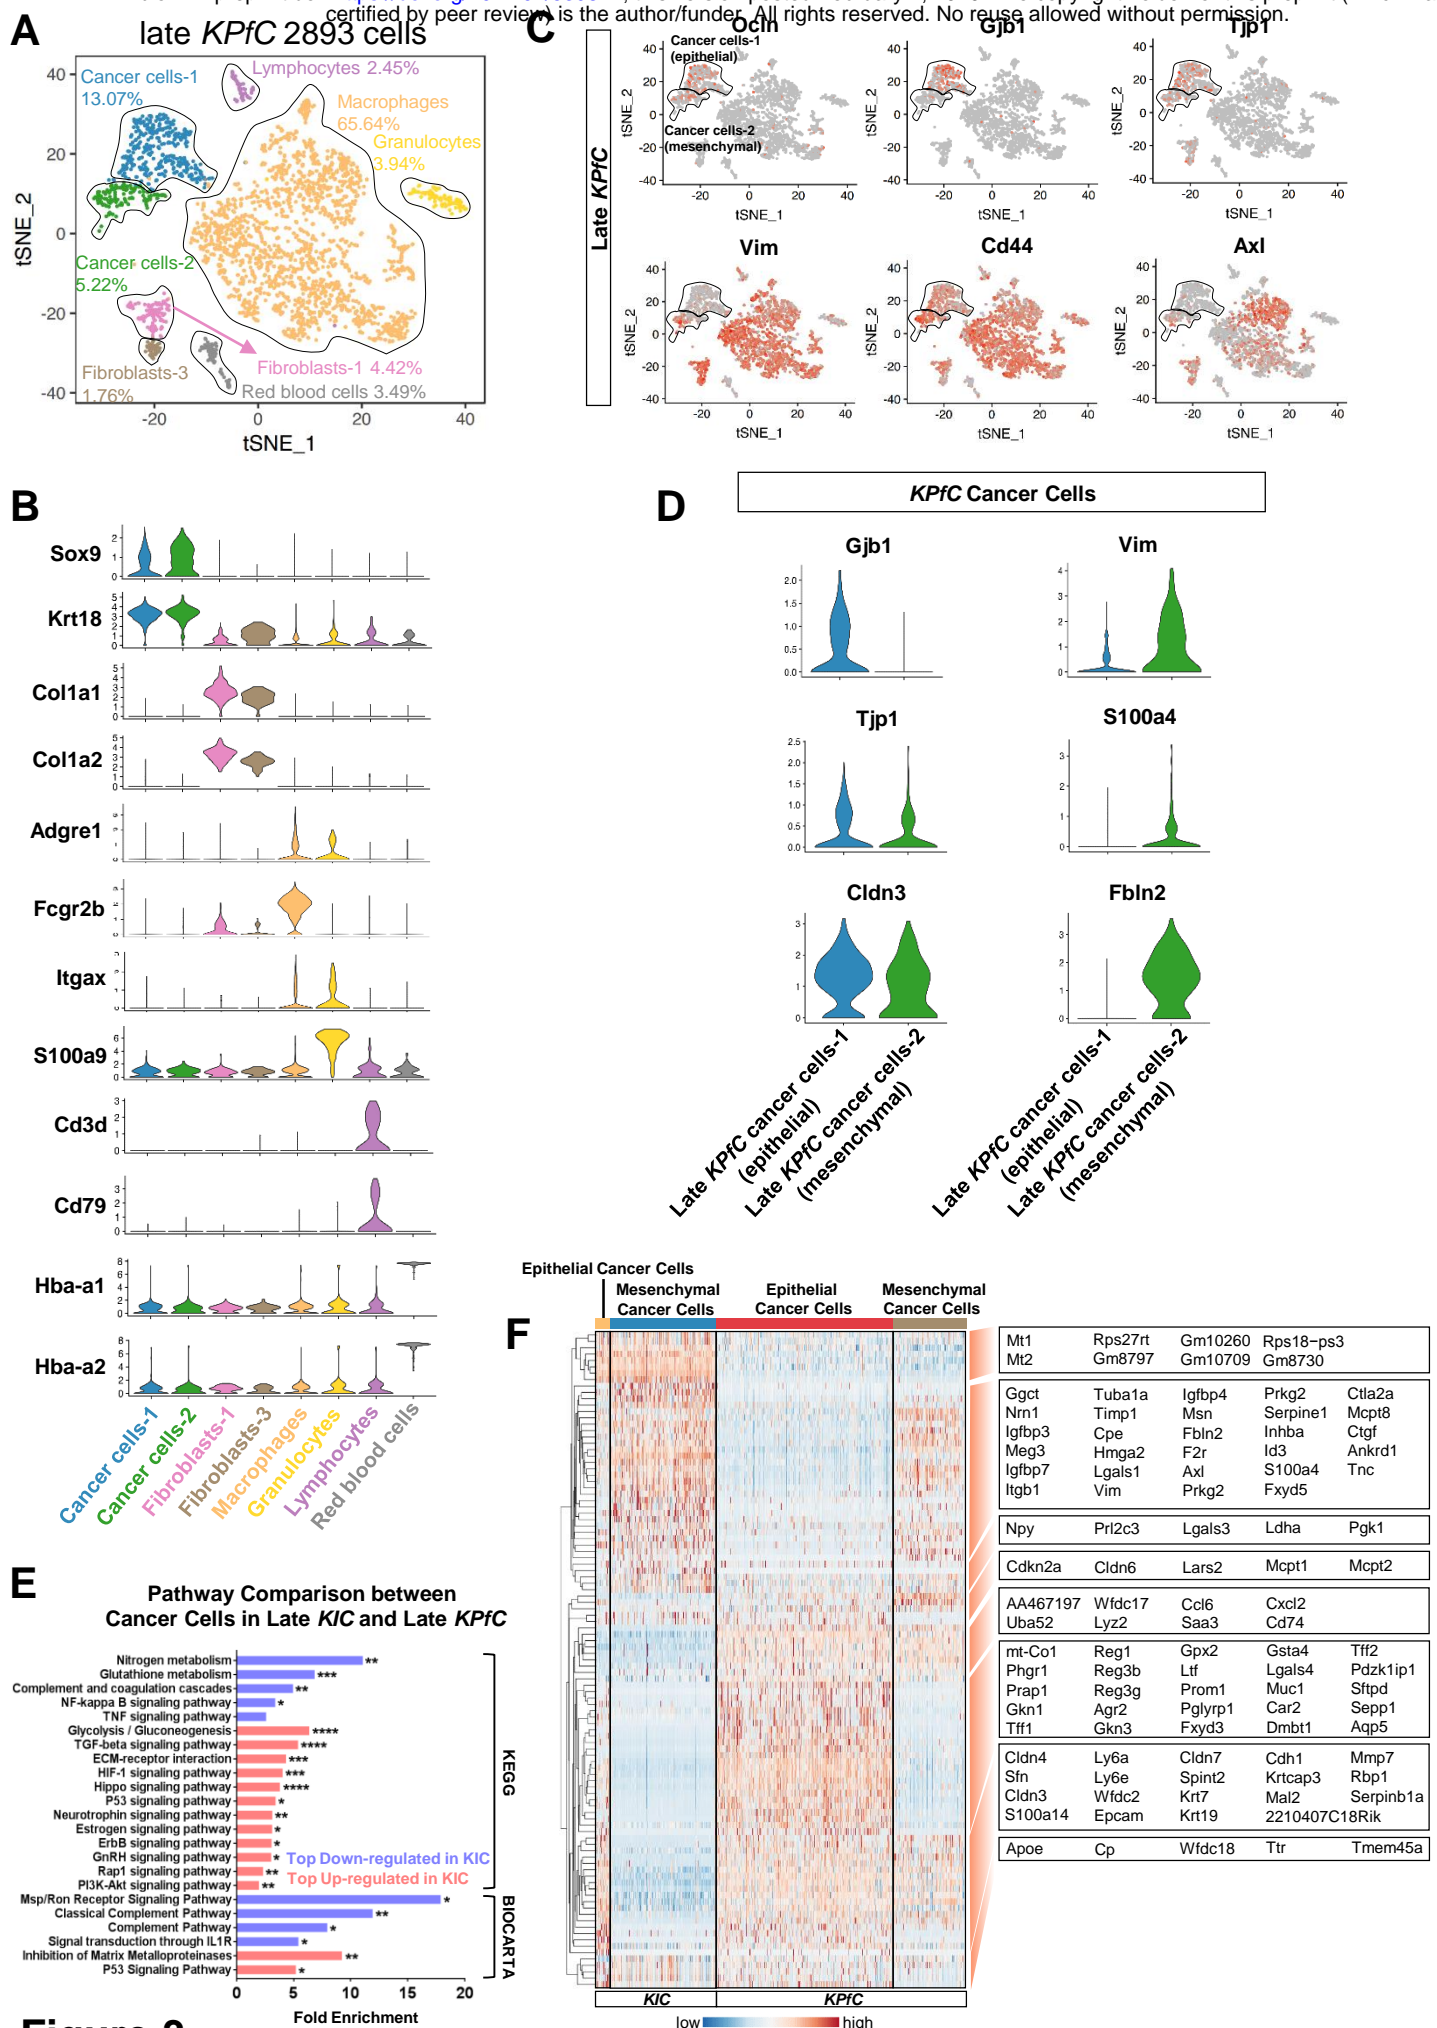

**Figure 3**

**A**

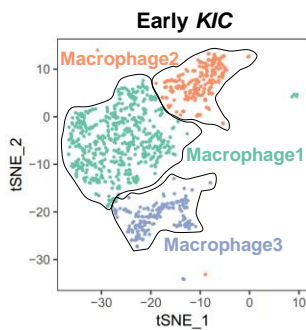

**B**

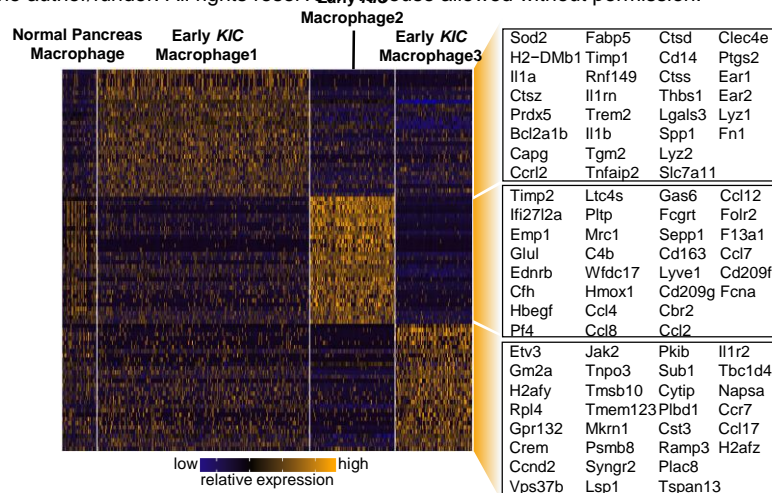

**C**

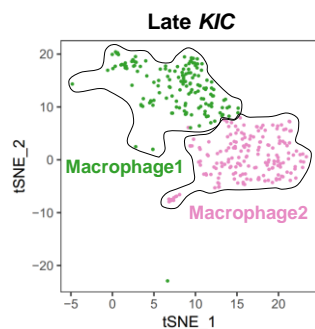

**D**

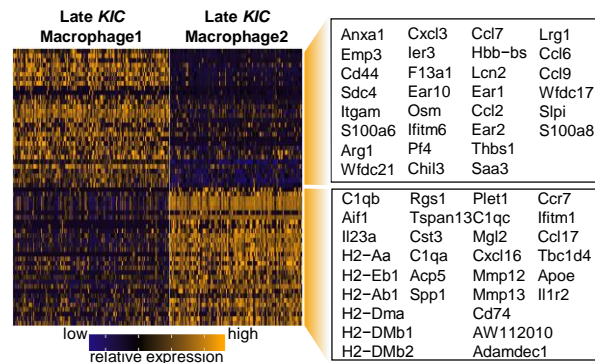

**E**

**Early KIC Macrophage Signatures**

**Gene Ontology Biological Process Analysis**

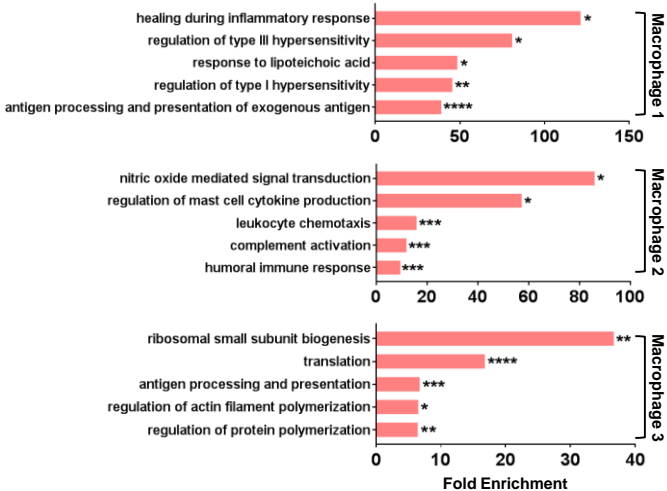

**G**

**KIC Macrophages**

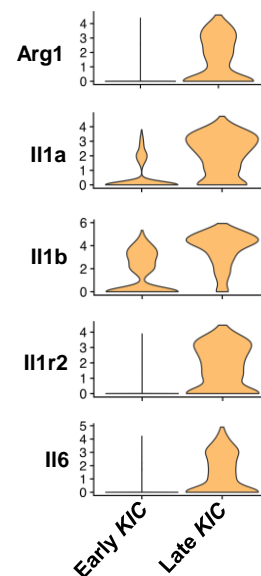

**F**

**Late KIC Macrophage Signatures**

**Gene Ontology Biological Process Analysis**

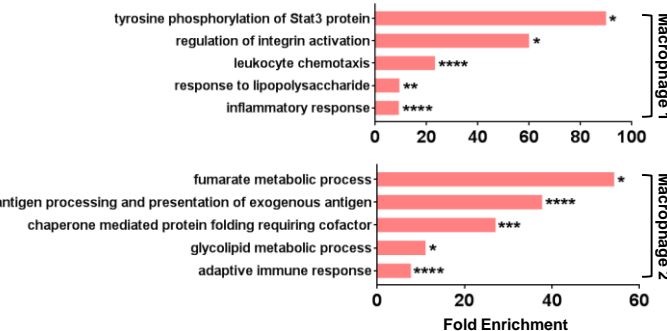

**H**

**Early and Late KIC Macrophages Comparison Gene Ontology Biological Process Analysis**

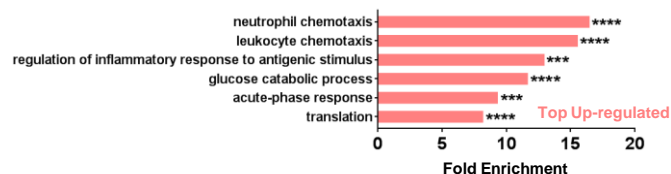

**Figure 4**

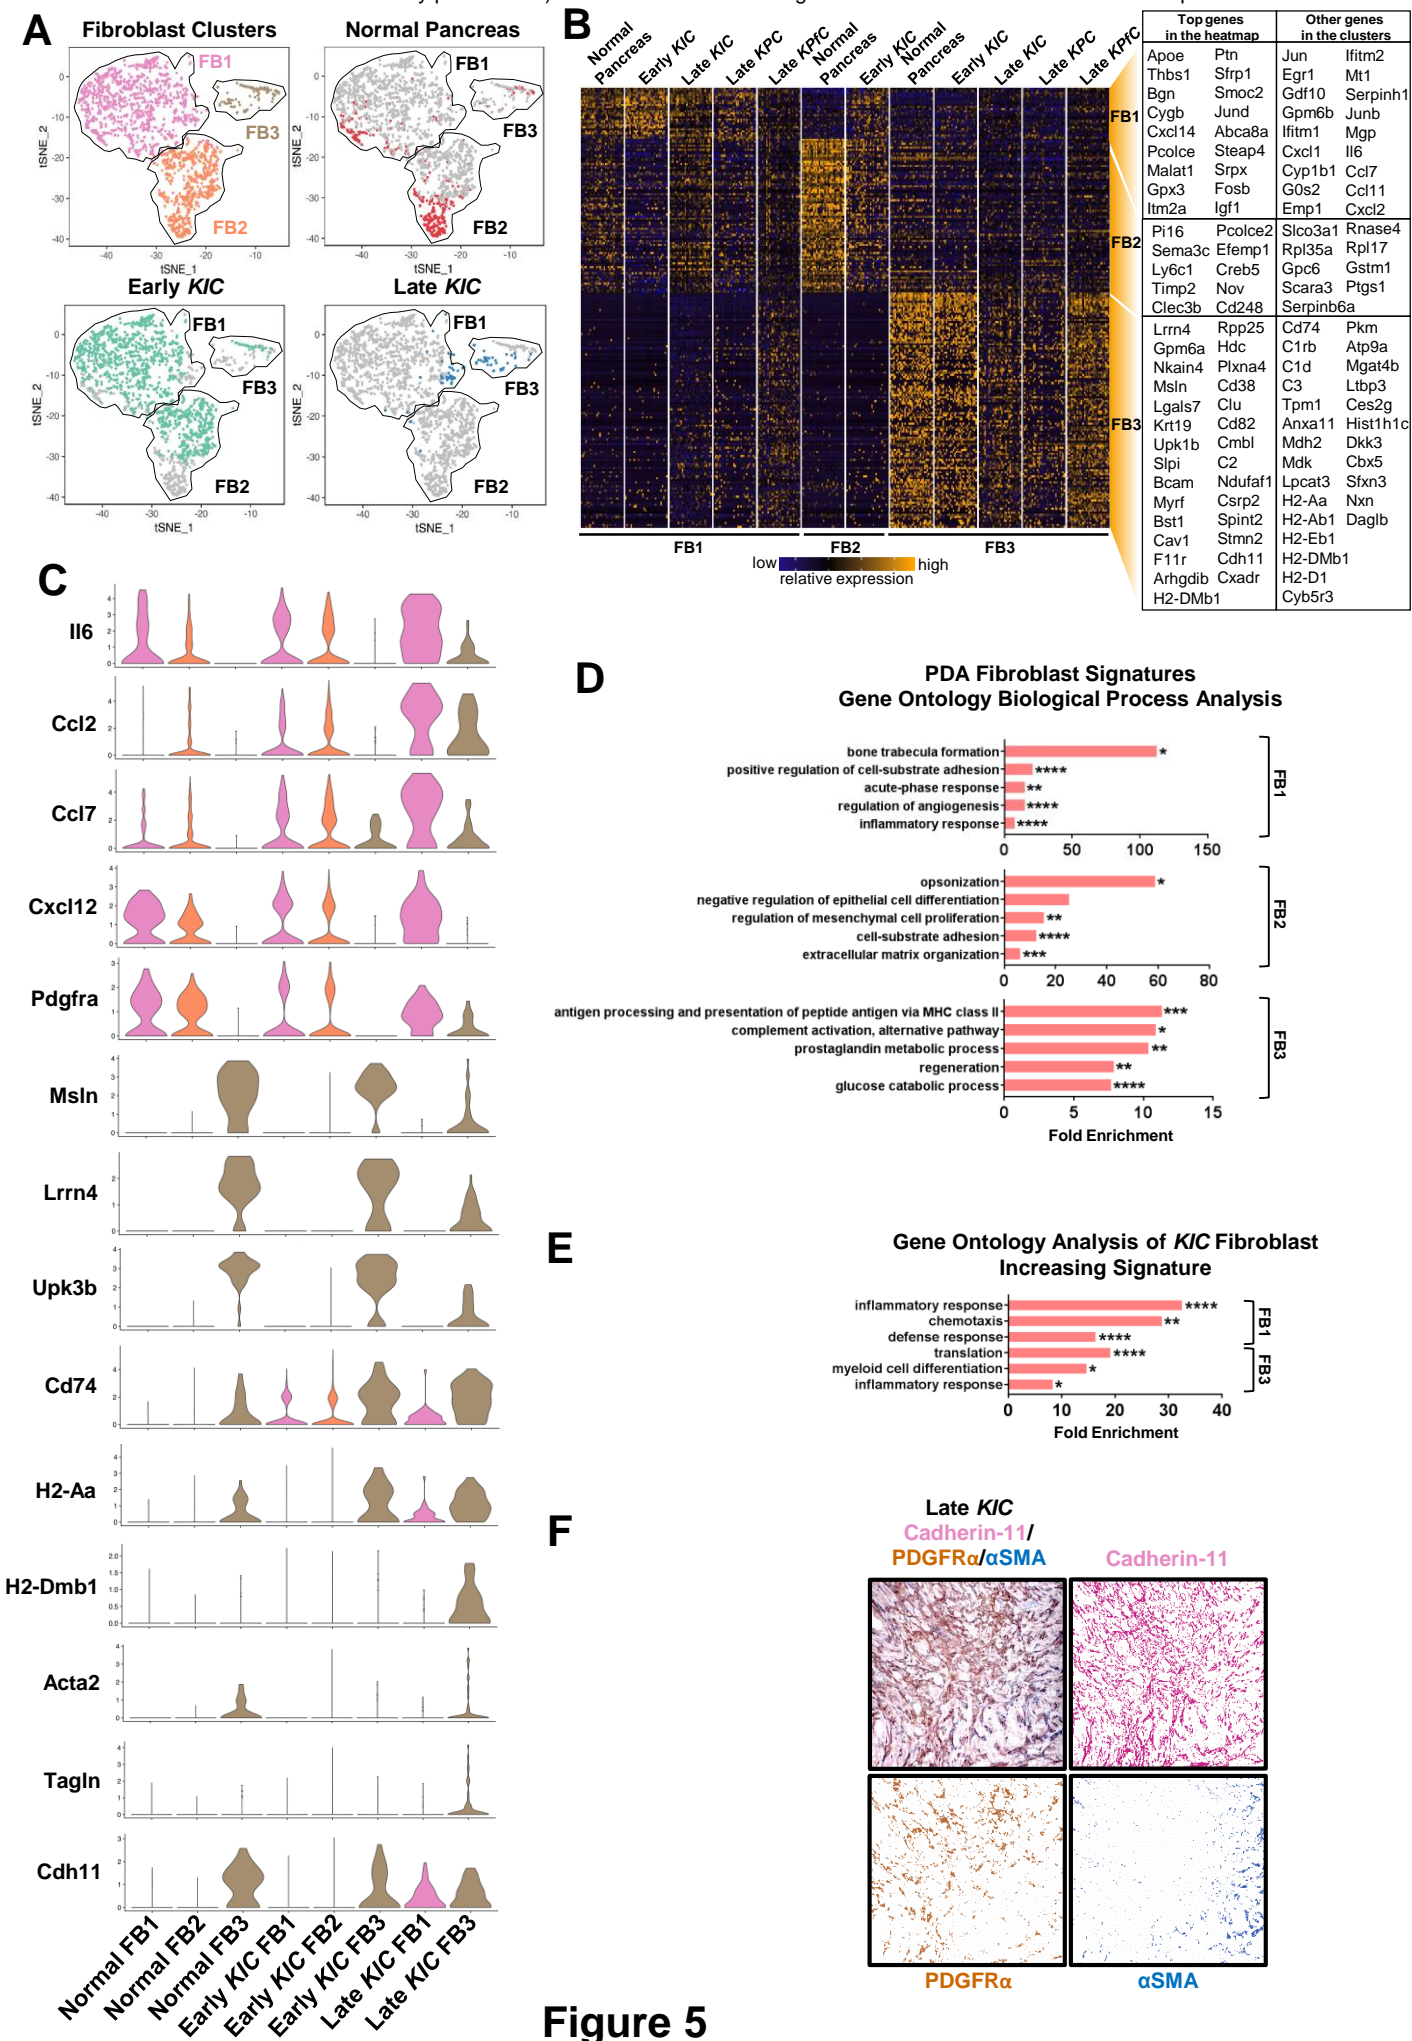

**Figure 5**

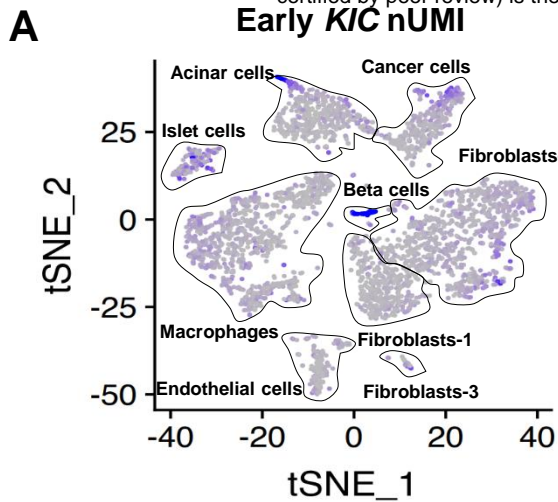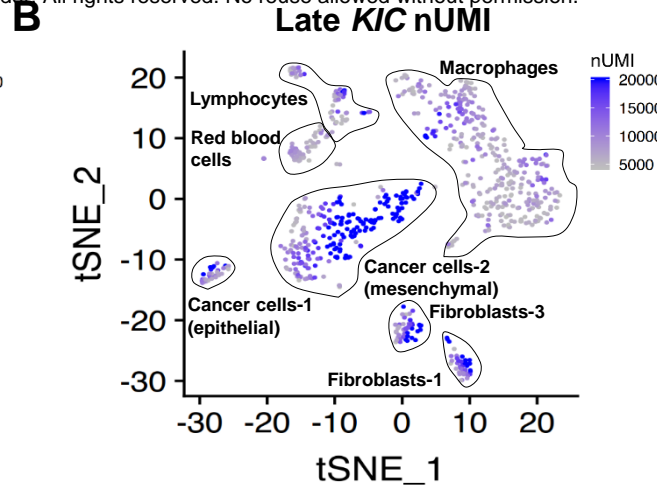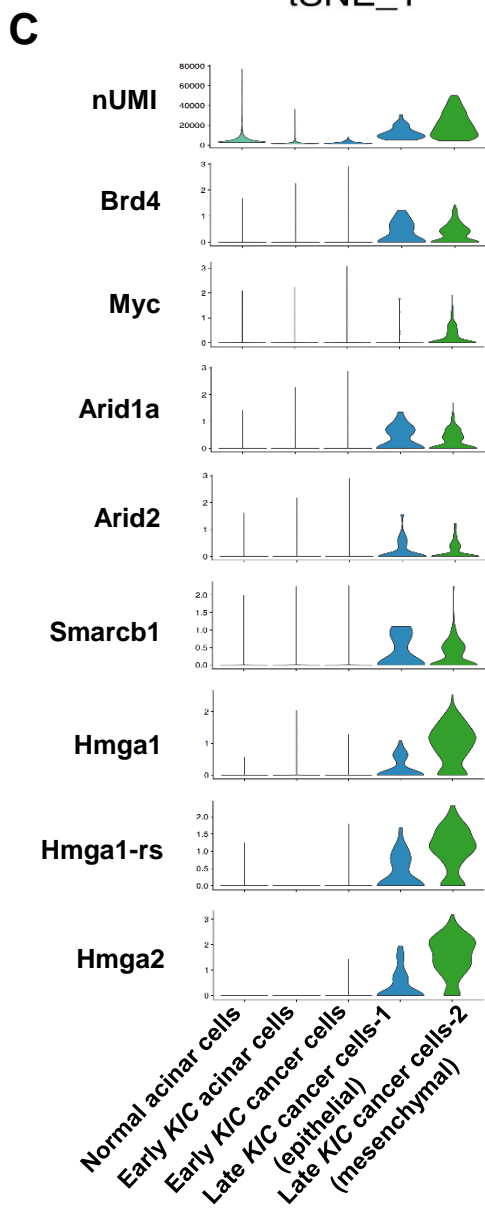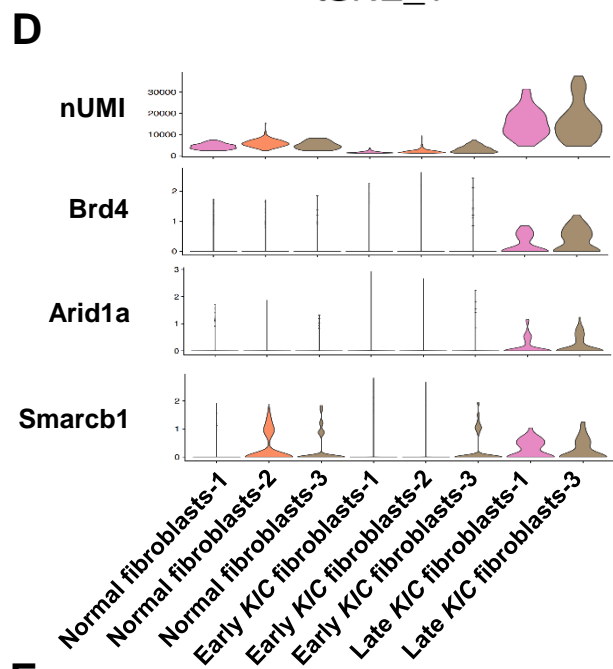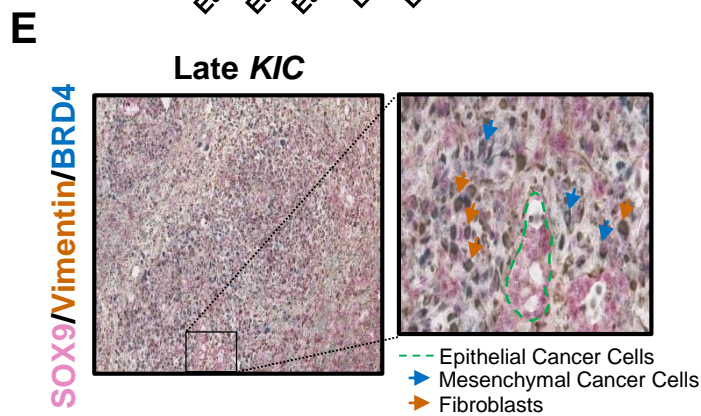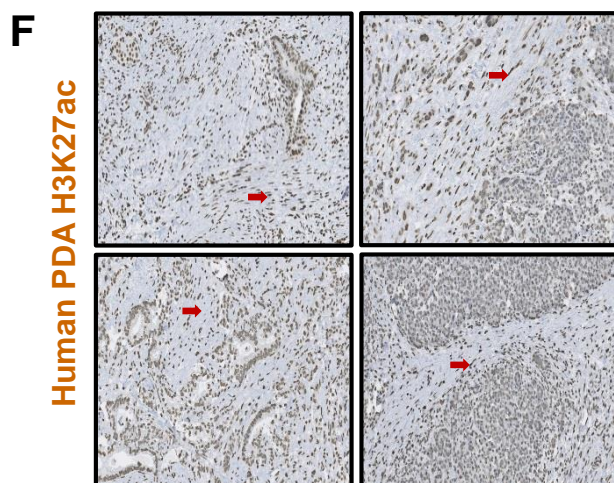

**Figure 6**

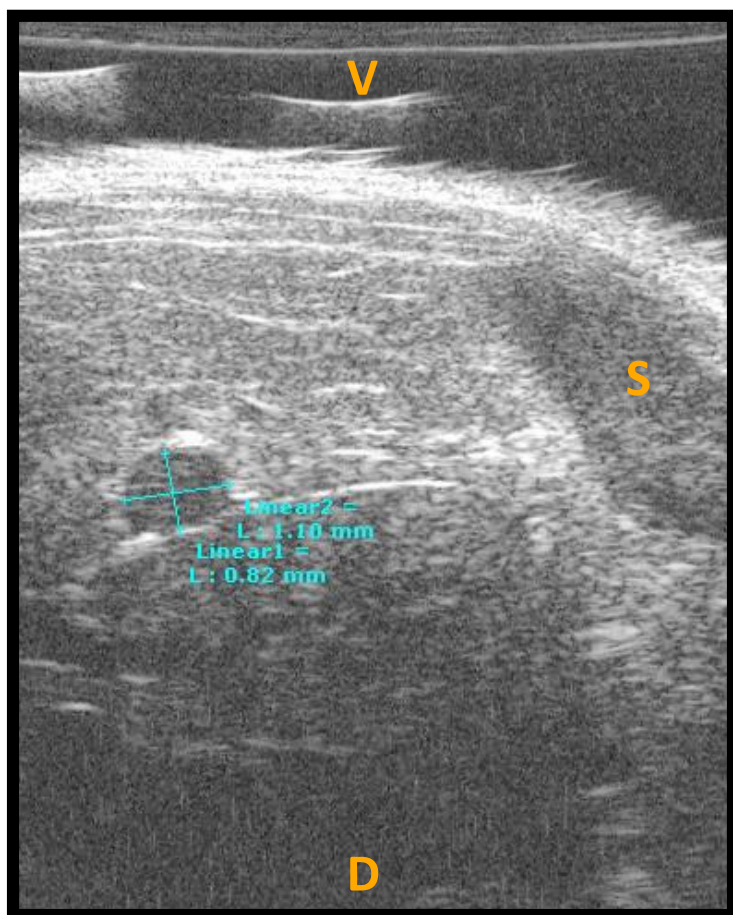

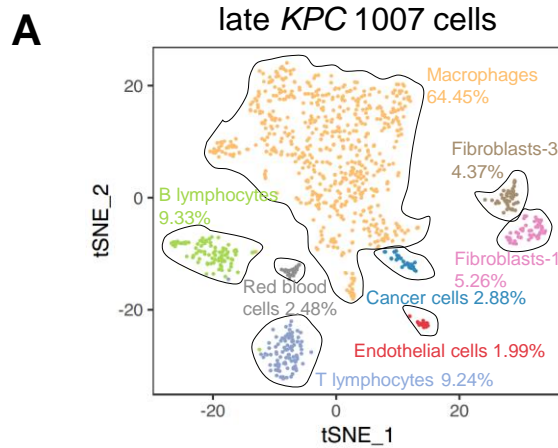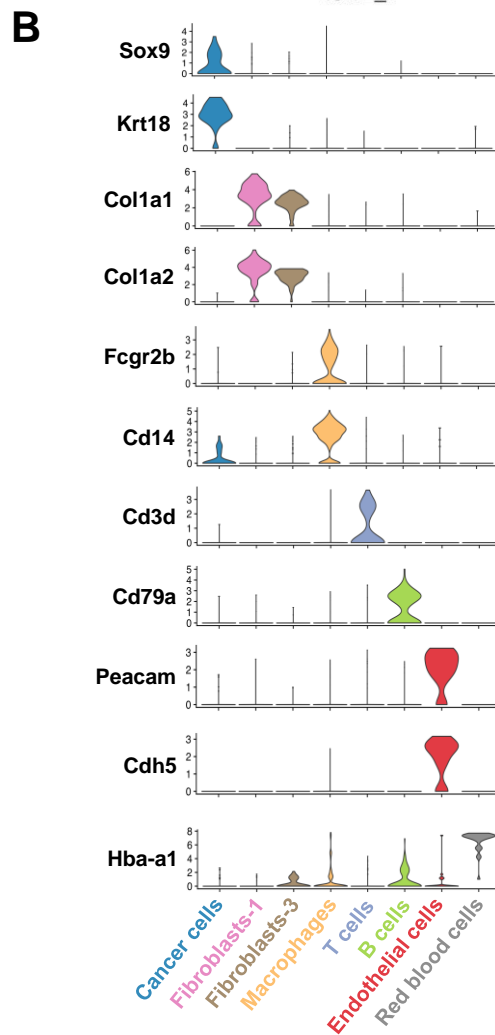



### KPfc Macrophages

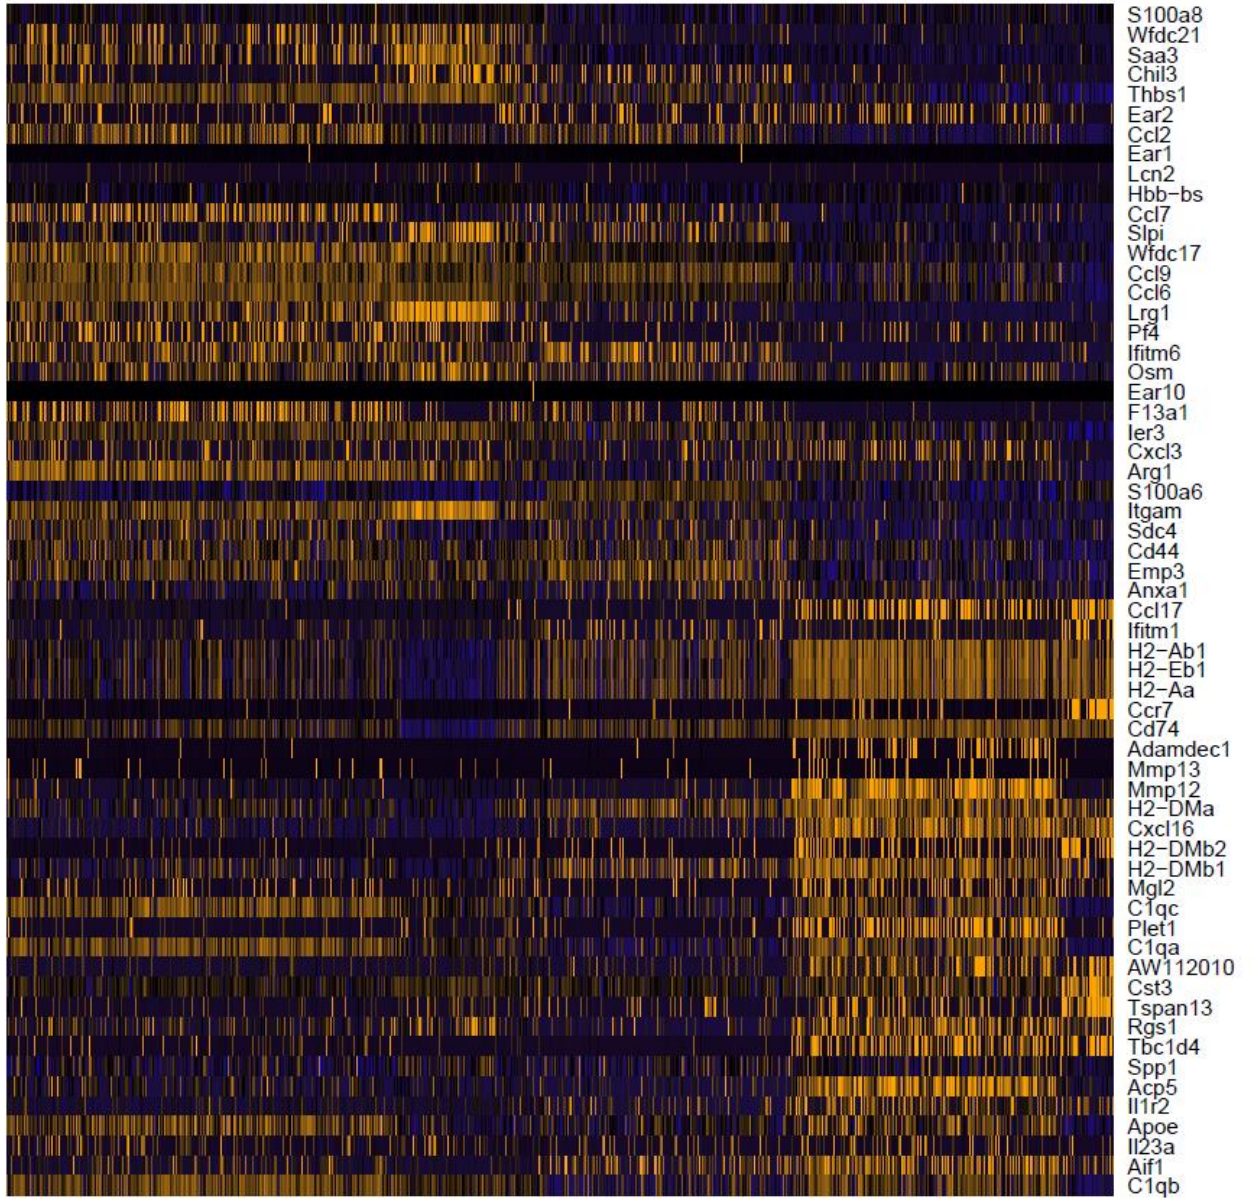

Macrophage 1

Macrophage 2

**A**

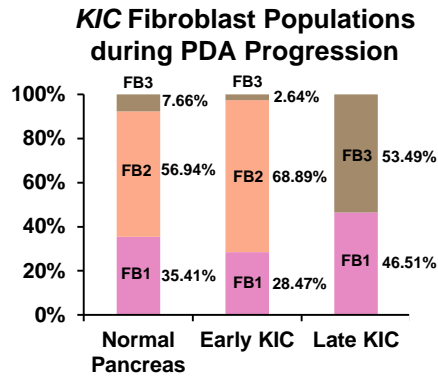

**B**

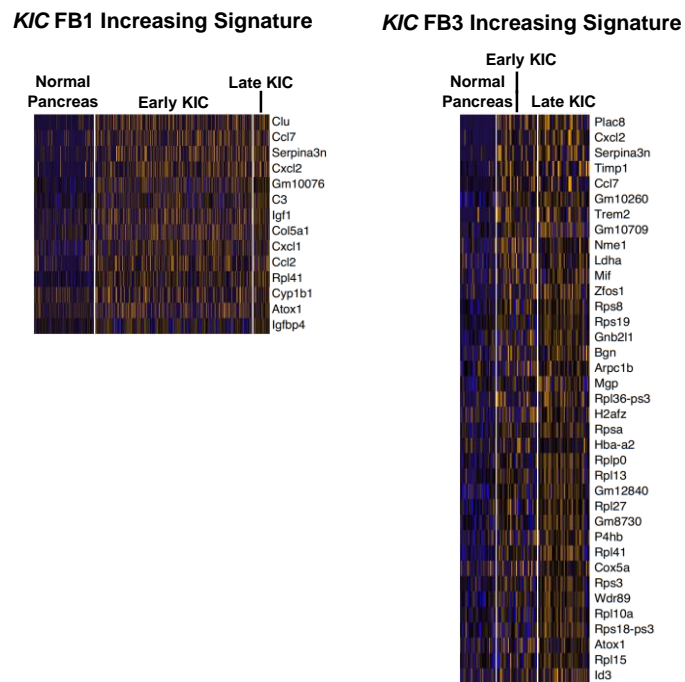

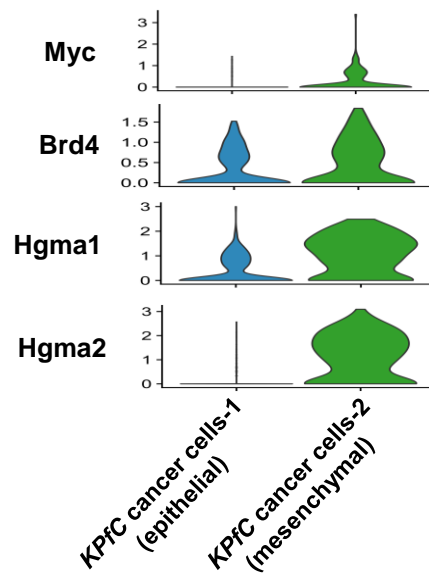

Source: https://www.biorxiv.org/content/10.1101/539874v1.full.pdf
